# 1 Cellular co-infection can modulate the efficiency of influenza A virus 2 production and shape the interferon response

3  
4 Brigitte E. Martin<sup>1\*</sup>, Jeremy D. Harris<sup>3\*</sup>, Jiayi Sun<sup>1</sup>, Katia Koelle<sup>3</sup>, Christopher B. Brooke<sup>1,2</sup>

5  
6 <sup>1</sup> Department of Microbiology, University of Illinois at Urbana-Champaign, Urbana, IL

7 <sup>2</sup> Carl R. Woese Institute for Genomic Biology, University of Illinois at Urbana-Champaign, Urbana,  
8 IL

9 <sup>3</sup> Department of Biology, Emory University, Atlanta, GA

10 \* Authors contributed equally

11  
12 Corresponding authors: Christopher Brooke (cbrooke@illinois.edu) and Katia Koelle  
13 (katia.koelle@emory.edu)

## 14 **ABSTRACT**

15  
16 During viral infection, the numbers of virions infecting individual cells can vary significantly over  
17 time and space. The functional consequences of this variation in cellular multiplicity of infection  
18 (MOI) remain poorly understood. Here, we rigorously quantify the phenotypic consequences of  
19 cellular MOI during influenza A virus (IAV) infection over a single round of replication in terms of  
20 cell death rates, viral output kinetics, interferon and antiviral effector gene transcription, and  
21 superinfection potential. By statistically fitting mathematical models to our data, we precisely  
22 define specific functional forms that quantitatively describe the modulation of these phenotypes  
23 by MOI at the single cell level. To determine the generality of these functional forms, we compare  
24 two distinct cell lines (MDCK cells and A549 cells), both infected with the H1N1 strain A/Puerto  
25 Rico/8/1934 (PR8). We find that a model assuming that infected cell death rates are independent  
26 of cellular MOI best fits the experimental data in both cell lines. We further observe that a model  
27 in which the rate and efficiency of virus production increase with cellular co-infection best fits our  
28 observations in MDCK cells, but not in A549 cells. In A549 cells, we also find that induction of  
29 type III interferon, but not type I interferon, is highly dependent on cellular MOI, especially at early  
30 timepoints. This finding identifies a role for cellular co-infection in shaping the innate immune  
31 response to IAV infection. Finally, we show that higher cellular MOI is associated with more potent  
32 superinfection exclusion, thus limiting the total number of virions capable of infecting a cell.  
33 Overall, this study suggests that the extent of cellular co-infection by influenza viruses may be a  
34 critical determinant of both viral production kinetics and cellular infection outcomes in a host cell  
35 type-dependent manner.

## 36 37 **AUTHOR SUMMARY**

38  
39 During influenza A virus (IAV) infection, the number of virions to enter individual cells can be  
40 highly variable. Cellular co-infection appears to be common and plays an essential role in  
41 facilitating reassortment for IAV, yet little is known about how cellular co-infection influences  
42 infection outcomes at the cellular level. Here, we combine quantitative *in vitro* infection  
43 experiments with statistical model fitting to precisely define the phenotypic consequences of  
44 cellular co-infection in two cell lines. We reveal that cellular co-infection can increase and  
45 accelerate the efficiency of IAV production in a cell line-dependent fashion, identifying it as a  
46 potential determinant of viral replication kinetics. We also show that induction of type III, but not  
47 type I, interferon is highly dependent upon the number of virions that infect a given cell, implicating

48 cellular co-infection as an important determinant of the host innate immune response to infection.  
49 Altogether, our findings show that cellular co-infection plays a crucial role in determining infection  
50 outcome. The integration of experimental and statistical modeling approaches detailed here  
51 represents a significant advance in the quantitative study of influenza virus infection and should  
52 aid ongoing efforts focused on the construction of mathematical models of IAV infection.

53

## 54 INTRODUCTION

55 Cellular co-infection plays an important, yet poorly defined, role in shaping the outcome of  
56 influenza A virus (IAV) infection. By facilitating reassortment between incoming viral genomes,  
57 cellular co-infection can give rise to new viral genotypes with increased fitness or emergence  
58 potential (1). Cellular co-infection can also enhance the replicative potential of the virus by  
59 promoting the complementation and multiplicity reactivation of the semi-infectious particles that  
60 constitute the bulk of influenza virus populations (2–4). Despite its clear importance, the  
61 prevalence and the specific functional consequences of cellular co-infection during IAV infection  
62 remain largely unknown.

63

64 We and others have previously shown that cellular co-infection can be common *in vivo* (5–7).  
65 There is growing evidence that IAV replication and spread is focal and thus that the distribution  
66 of individual virions across cells and tissues is highly spatially structured, resulting in foci of high  
67 cellular multiplicity of infection (MOI) (8–11). Given the dynamic distribution of virions over time  
68 and space during infection, it is likely that the MOIs of individual infected cells are highly variable.  
69 This raises the question of whether variation in the number of virions that infect a cell has distinct  
70 phenotypic consequences. If so, it could have significant implications for understanding IAV  
71 infection dynamics as two viral populations of identical size and genome sequence could give rise  
72 to divergent infection outcomes if the dispersal patterns of virions (and thus the MOI distribution  
73 across cells) differs.

74

75 Several previous studies have suggested that the number of virions that enter a given cell  
76 (referred to throughout as “viral input” or “cellular MOI”) may affect replication kinetics and  
77 interferon (IFN) induction (12–16). However, the phenotypic consequences of cellular MOI during  
78 IAV infection have not yet been rigorously or comprehensively quantified. In this manuscript, we  
79 focus on the infection dynamics of two cell lines (MDCK and A549) infected with A/Puerto  
80 Rico/8/1934 (PR8). We combine precise single-cycle infection experiments with statistical model  
81 fitting to reveal that cellular MOI can significantly alter virus production rates, the host  
82 transcriptional response to infection, and the potential for superinfection. In doing so, we precisely  
83 define functional forms that can account for the observed relationships between viral input and  
84 the phenotypes of infected cells, information that will aid future efforts to quantitatively model IAV  
85 infection. Altogether, these results reveal and define an underappreciated role for cellular co-  
86 infection in shaping the outcome of IAV infection.

87

## 88 RESULTS

89 To define how variation in cellular MOI affects viral replication dynamics and the host response  
90 to infection, we infected either MDCK or A549 cells with PR8 across a 100-fold range of bulk  
91 MOIs. The working stock of PR8 that we used has a physical particle (matrix segment genome  
92 equivalents (GE)/mL) to fully infectious particle ratio (tissue culture infectious dose 50  
93 (TCID50)/mL) of 8.19, similar to previous reports (2). To eliminate the confounding effects of  
94 secondary spread within culture on infectious outcomes, we limited infections to a single cycle by  
95 treating cells with 25 mM NH<sub>4</sub>Cl at 2 hpi (17). Thus, in all experiments described below, we were  
96 examining outcomes following a single round of infection.

97

## 98 **Precise quantification of the actual bulk MOI**

99 An accurate assessment of the phenotypic consequences for cellular co-infection depends upon  
100 the precise measurement of the average number of viral genomes that actually contribute to viral  
101 replication and/or immune activation. We suspected that the standard method for calculating MOI  
102 in bulk cell culture, based on the dilutions of viral working stock used, may overestimate the actual  
103 number of virions that successfully infect due to incomplete virion adsorption or entry.  
104

105 To calculate the “actual” bulk MOI that contributed to infection, we quantified the fraction of virus  
106 inoculum that was successfully bound or taken up during the adsorption phase for both MDCK  
107 and A549 cells. We first measured the concentration of virus present in the inoculum added to  
108 cells (0 hpi) and the amount of remaining unbound virus following 1-hour adsorption at 4°C (1 hpi)  
109 across a range of intended bulk MOIs (**Fig 1A**) in triplicate by RT-qPCR. Cells were washed  
110 extensively and transitioned to growth media following the 1 hr adsorption period. To confirm that  
111 our post-adsorption washes effectively removed any unbound inoculum virus that could artificially  
112 inflate subsequent viral output measurements, we quantified extracellular virus immediately  
113 following wash and found that viral loads were negligible ( $<10^3$  genome equivalent (GE)/mL; data  
114 not shown). At 2 hours post-adsorption (3 hpi), we again measured the amount of extracellular  
115 virus present and found titers that were surprisingly high for this early timepoint, especially at an  
116 intended bulk MOI of 10 (**Fig 1A**).  
117

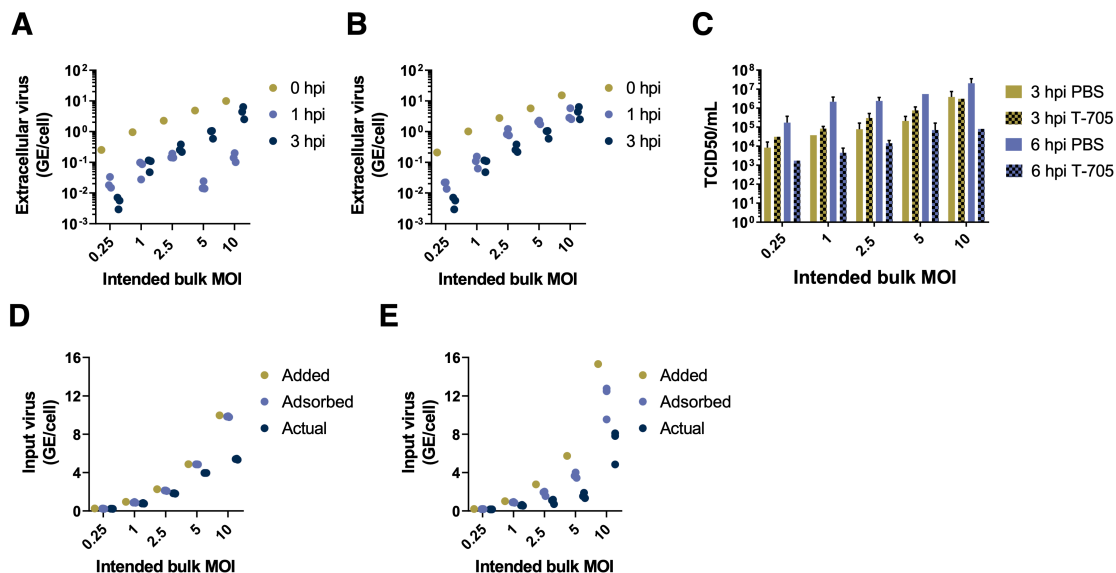

**Figure 1. Precise quantification of actual bulk MOI.** (A) Extracellular virus concentrations present in the inoculum (0 hpi), remaining unbound following adsorption (1 hpi), and measured extracellularly at 3 hpi for both MDCK and A549 cells, at the indicated bulk MOIs. Extracellular virus concentrations are given in units of viral genome equivalents (GE) per cell. 0 hpi data points show single viral measurements from the inoculum used for all replicates. 1 hpi and 3 hpi points show individual measurements from replicate infection wells. (B) Virus output at 3 or 6 hpi from MDCK cells infected in triplicate with PR8 at the indicated intended MOIs and treated with either PBS or with 40  $\mu$ M T-705 for 2 hrs prior to infection and throughout the duration of infection. (C) Quantification by RT-qPCR of virus present in inoculum (0 hpi; “added MOI”), virus adsorbed into cells after 1 hpi (calculated by subtracting extracellular virus present at 1 hpi from that present in inoculum at 0 hpi; “adsorbed MOI”), and virus expected to actually contribute to infection (calculated by subtracting the average of three replicates of extracellular virus measurements at 3 hpi from adsorbed MOI; “actual MOI”) for MDCK and A549 cells.

118

119 To determine whether extracellular virus present at 3 hpi was newly produced or carried-over  
120 from the inoculum, we repeated the above experiments in MDCK cells treated from 2 hours prior  
121 to infection through the duration of infection (6 hpi) with 40  $\mu$ M of the antiviral drug T-705, which  
122 inhibits the production of viral progeny (18). Drug treatment significantly reduced viral titers at 6  
123 hpi, but not 3 hpi, indicating that extracellular virus measured at 3 hpi consists of inoculum virus  
124 that was taken up but then released without actually infecting the cell (**Fig 1B**). Thus, to precisely  
125 quantify the actual bulk MOI of virus that contributed to infection in each sample, we subtracted  
126 the amounts of extracellular virus detected at both 1 hpi and 3 hpi (for this, we used the average  
127 of three experimental replicates since they were from independent samples) from our  
128 measurements of bulk MOI at 0 hpi. This gave us an actual bulk MOI range of 0.23-5.45 for MDCK  
129 cells and 0.16-8.09 for A549 cells (**Fig 1C**). Hereafter, we use these estimated actual bulk MOIs  
130 instead of intended bulk MOIs to quantify the effects of cellular MOI on virus production kinetics  
131 and cellular infection outcomes and refer to these actual bulk MOIs simply as ‘bulk MOIs’.

132

### 133 **Assumption of viral infection distribution**

134 To quantify the effects of cellular MOI on virus production kinetics and cellular infection outcomes,  
135 an assumption needs to be made about how virus particles are distributed across cells. It is often  
136 assumed that the number of virions that infect a given cell follows a Poisson distribution with both  
137 the mean and variance in cellular MOI equal to the overall bulk MOI. However, empirical support  
138 for this assumption is lacking. To accommodate potential deviations from the Poisson distribution,  
139 we instead assume that virions are distributed across cells according to a negative binomial  
140 distribution. This distribution allows for virions to be overdispersed when the dispersion parameter  
141 is small, with the variance in cellular MOI across cells exceeding the mean cellular MOI. That is,  
142 in the case of overdispersion (relative to a Poisson assumption), a higher fraction of cells will have  
143 either low/no viral input or high viral input relative. A negative binomial distribution, however, also  
144 allows for virions to be Poisson-distributed across cells when the dispersion parameter is large.  
145 As such, this distribution provides us with a more flexible approach for modeling the distribution  
146 of viral particles across cells. To be thorough, we also considered the possibility of virions being  
147 distributed according to a zero-inflated Poisson distribution, where a fraction of cells remain  
148 uninfected, and the remaining cells have cellular multiplicities of infection governed by a Poisson  
149 distribution with a higher mean to account for the cells that remain uninfected. Similar to the  
150 negative binomial distribution, the zero-inflated Poisson distribution allows for the incorporation of  
151 cellular heterogeneity in a phenomenological manner.

152

153 When fitting the cell death models (described in the next section) to experimental data, we  
154 simultaneously estimate parameters of these viral infection distribution models using  
155 fluorescence-activated cell sorting (FACS) measurements taken at 18 hpi (**Fig S1**). When fitting  
156 the remaining statistical models (described below), we take as given the most well-supported,  
157 already-parameterized viral infection distribution and the most well-supported, already-  
158 parameterized cell death model.

159

### 160 **Cell death rates are time-dependent but virus input-independent in both MDCK and A549** 161 **cells**

162 The overall productivity of an infected cell depends in part upon how long the cell survives  
163 following infection, and we hypothesized that cellular lifespans might be affected by cellular MOI.  
164 We quantified how differences in bulk MOI affected cell survival at different times post-infection  
165 (compared with mock infected cells) using trypan blue exclusion. As expected, the number of  
166 surviving MDCK cells generally decreased with higher bulk MOIs for each timepoint tested (**Fig**  
167 **2**). To determine whether this observed decrease in cell survival was simply due to increases in



168 the fraction of infected cells, or if, instead, cells co-infected with multiple virions died at faster rates  
169 than singly infected cells, we statistically fit a set of mathematical models to the experimental data  
170 (Methods).  
171

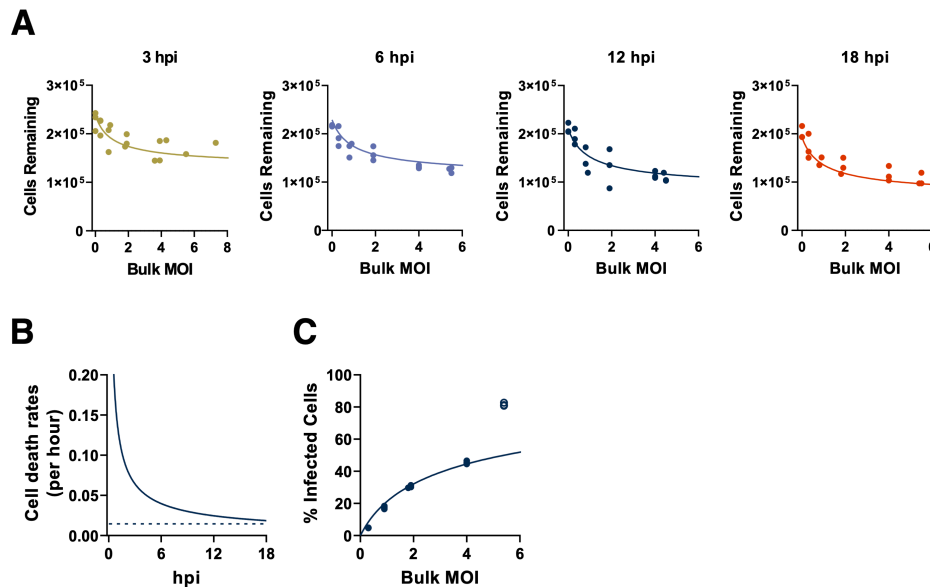

**Figure 2. MDCK cell death rates are time-dependent and input-independent.** (A) The numbers of MDCK cells surviving following infection, as determined by trypan blue exclusion at the indicated timepoints across our experimental range of bulk MOIs. Values represent the number of trypan blue negative cells in each sample at 3, 6, 12, and 18 hours post infection (hpi). Lines indicate the best model fit to these data, which is given by the time-dependent, input-independent cell death rate model, as parameterized in **Table S1**. (B) Estimated input-independent cell death rate over the course of cellular infection (solid) and constant background cell death rate (dashed; obtained from mock infected cells). (C) Percent of surviving MDCK cells that are infected at 18 hpi, as measured by FACS (FACS plots shown in **Fig S1**). The line indicates the negative binomial distribution with time-dependent input-independent cell death rate model fit evaluated at 18 hpi. Statistical parameterization of this model (overdispersion parameter  $r = 0.597$ ; **Table S1**) indicates a high level of overdispersion and significant deviation from a Poisson-distributed model. Data from the highest bulk MOI were excluded from model fits due to the lack of confidence in the accuracy of FACS measurements at the highest MOI examined.

172  
173

174 We first considered a model in which all infected cells died at a constant (and identical) rate over  
175 the course of cellular infection, under all three possible viral infection distributions (Poisson,  
176 negative binomial, and zero-inflated Poisson). Jointly fitting this cell death model and the viral  
177 infection distribution to the FACS data and the number of surviving MDCK cells, we found that  
178 the negative binomial distribution was most well-supported by the data (**Table S1**; **Fig S2B**),  
179 indicating that the distribution of virions across cells is highly overdispersed. This model, with a  
180 constant and identical (input-independent) cell death rate, however systematically overestimated  
181 the number of surviving cells at early time points following infection (3 and 6 hpi; **Fig S2A**) and  
182 systematically underestimated the number of surviving cells at the latest time point (18 hpi; **Fig**  
183 **S2A**). We next considered a model in which infected cell death rates were allowed to vary over  
184 the course of infection (i.e., death rates could be time-dependent), with rates that were still  
185 independent of cellular MOI (i.e., death rates were input-independent). For this model, we chose  
186 a Weibull hazard function as the functional form to describe the time-varying death rate because  
187 of its common use in survival analysis. Jointly fitting this model and the viral infection distributions  
188 to the MDCK cell data and the FACS data yielded, for all three viral infection distributions  
189 considered, an infected cell death rate that decreased over the course of cellular infection (**Table**  
190 **S1**). Of the viral infection distribution models, the negative binomial one was again most well-  
191 supported by the data (**Table S1**). Under this distribution, the parameterized time-dependent,

192 input-independent cell death model did not over- or underestimate the number of surviving cells  
193 at any of the four time points considered (**Fig 2A**) and was able to quantitatively reproduce the  
194 measured FACS data (**Fig 2C**). This time-dependent cell death rate model was statistically  
195 preferred over the time-independent cell death rate model (**Table S1**).

196  
197 We next considered a time-independent, input-dependent model of cell death rates in which the  
198 death rate of a given cell increased with viral input. Again, the negative binomial distribution was  
199 preferred over both the Poisson model and the zero-inflated Poisson model (**Table S1**). Under  
200 this negative binomial model for the viral infectivity distribution, the cell death model yielded similar  
201 fits as the time-independent, input-independent model (**Fig S3**). Indeed, its statistical  
202 parameterization effectively reduced this model to the time-independent, input-independent  
203 model (**Table S1**). This model had less statistical support than the time-independent, input-  
204 independent model though because of its higher complexity (**Table S1**). Finally, we considered a  
205 general time-dependent, input-dependent model that could reduce, under specific  
206 parameterizations, to either a time-independent model, an input-independent model, or both  
207 (**Table S1**). Again, the negative binomial distribution was preferred over both the Poisson model  
208 and the zero-inflated Poisson model (**Table S1**). Under this negative binomial model, statistical  
209 parameterization of this cell death model yielded fits similar to those of the time-dependent, input-  
210 independent model. Indeed, the parameterization of this model effectively reduced this model to  
211 this simpler, preferred model. Because of its greater complexity, this cell death rate model had  
212 less statistical support than the time-dependent, input-independent model. Overall, we found that  
213 the time-dependent, input-independent cell death rate model was the most well-supported cell  
214 death rate model for the MDCK cell data. This finding indicates that lower levels of cell survival at  
215 higher bulk MOIs (as observed in Figure 2) are likely simply due to there being a higher fraction  
216 of cells that are infected at higher MOIs, rather than being due to cell death rates being higher in  
217 cells with higher viral input.

218  
219 For all four models considered, the fits to the FACS data indicated that viral particles are decidedly  
220 not Poisson-distributed across cells in the bulk MOI range considered. Instead, the statistical  
221 parameterizations of all four models point towards a high level of viral overdispersion (**Table S1**).  
222 Models that forced the assumption of a Poisson distribution were unable to quantitatively  
223 reproduce the FACS data (**Fig S4A**). Models that allowed for a more flexible negative binomial  
224 distribution were statistically strongly preferred over those that assumed a Poisson distribution of  
225 virions across cells (**Fig S4A, Table S1**). The negative binomial model was also preferred over  
226 the zero-inflated Poisson model (**Table S1**), although not as strongly as over the standard Poisson  
227 model.

228  
229 For A549 cells, we considered the same set of cell death rate models and viral infectivity  
230 distribution models as we did for MDCK cells. Here, we again found that the best model fits  
231 assumed a negative binomial distribution for viral infectivity and that the time-dependent, input-  
232 independent cell death rate model was statistically preferred over the other three models (**Table**  
233 **S2; Fig 3**). In sum, by fitting to FACS data and a time course of surviving cell numbers, we found  
234 that a model that assumes that infected cell death rates are changing with time since infection  
235 (but not with viral input) is most well-supported by both MDCK and A549 data. In both cell lines,  
236 the parameterized model results in a cellular death rate that declines with time since infection.  
237 This finding, although not intuitive, is visually supported by the data. For example, it is visually  
238 apparent that in the MDCK cell line, at a given bulk MOI, that the number of surviving cells rapidly  
239 declines until 6 hpi, and then stays at similar levels until 18 hpi.

240

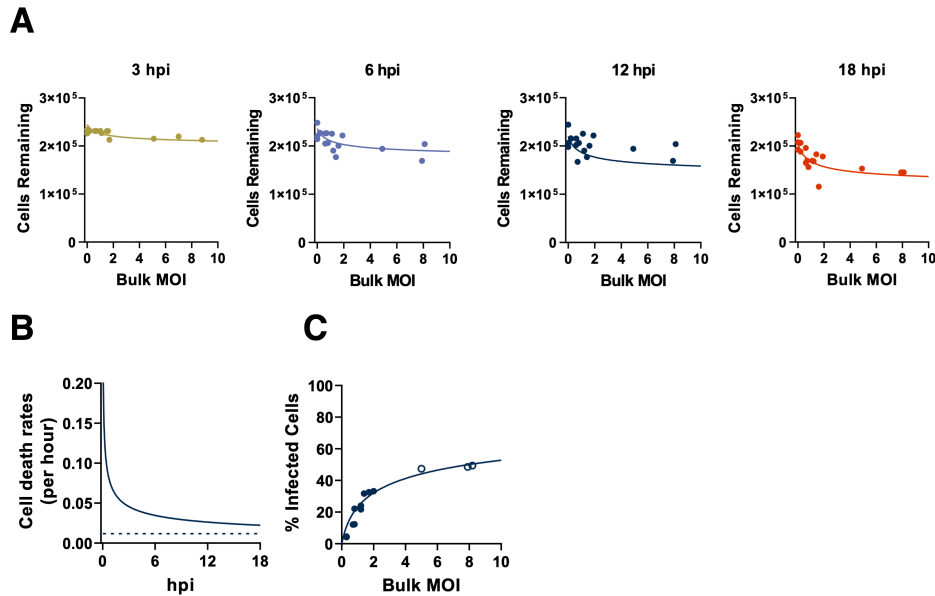

**Figure 3. A549 cell death rates are time-dependent and input-independent.** (A) The numbers of A549 cells surviving following infection, as determined by trypan blue exclusion at the indicated timepoints across our experimental range of bulk MOIs. Values represent the number of trypan blue negative cells in each sample. Lines indicate the best model fit to these data, given by the time-dependent, input-independent cell death rate model, as parameterized in **Table S2**. (B) Estimated A549 cell death rate (solid) and the constant background cell death model (dashed), fitting to both mock infected cells and MOI treatments over the course of infection. (C) Percent of surviving A549 cells that are infected at 18 hpi (FACS data). The line indicates the negative binomial distribution ( $r = 0.338$ ; **Table S2**) with time-dependent input-independent cell death rate model fit evaluated at 18 hpi. Data from the highest bulk MOI were excluded from model fits due to the lack of confidence in the accuracy of FACS measurements at the highest MOI examined.

241  
242

### 243 Cellular co-infection increases the rate of virus production in MDCK cells but not in A549 244 cells

245 We next asked how changes in bulk MOI affected virus production over a single cycle of infection  
246 in both MDCK and A549 cells. In the same experiments described above, we measured the total  
247 viral output (in GE/mL) from cells infected at different bulk MOIs at 6, 12, and 18 hpi. Not  
248 surprisingly, we observed that viral output from both cell lines was significantly increased at higher  
249 bulk MOIs for all time points tested (**Fig 4A**).

250

251 These findings raised the question of whether the increase in viral output at higher bulk MOIs is  
252 simply due to higher numbers of infected cells at higher bulk MOIs, or whether individual infected  
253 cells produce more virus output when co-infected by multiple virions. To infer the functional  
254 relationship between cellular MOI and viral output, we statistically fit several mathematical models  
255 of virus production to our data (Methods). Each of these models incorporated our results of cell  
256 death kinetics, described in the previous section. They each also incorporated the negative  
257 binomial distribution for viral infectivity, described in the previous section. The incorporation of  
258 these models was needed to accommodate the fact that only surviving infected cells should have  
259 the ability to contribute to viral output. For both MDCK and A549 cell lines, the first three models  
260 we fit were time-independent with respect to the rate of virus production but differed in their  
261 dependence upon cellular input. The statistical fits of these time-independent models to the data  
262 are summarized in **Table S3** (MDCK cells) and **Table S4** (A549 cells). In both cell lines, we found  
263 that even the best models overestimated virus output at 6 hpi and underestimated virus output at  
264 18 hpi, across all bulk MOIs examined (**Fig S5**).

265

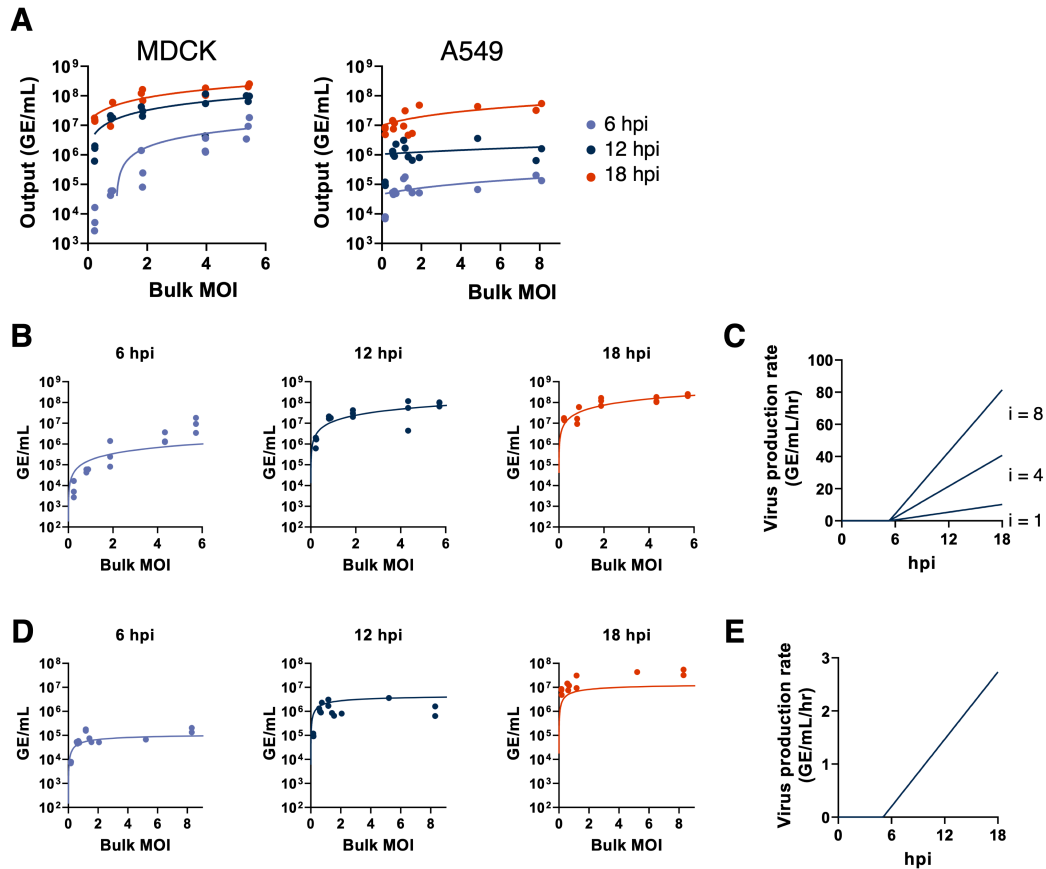

**Figure 4. Cellular co-infection increases the rate of virus production in MDCK cells but not in A549 cells.** (A) Viral output from single cycle infections of MDCK cells or A549 cells with PR8 over a range of bulk MOIs, as measured by RT-qPCR at the indicated hours post infection. Each data point represents both the actual MOI and viral output from a single infection well. Trend lines show linear regressions performed on the log-log scale. All regression slopes for MDCK cells are significantly positive ( $p < 0.0001$ ; 6 hpi: slope = 2.2,  $R^2 = 0.90$ ; 12 hpi: slope = 1.15,  $R^2 = 0.71$ ; 18 hpi: slope = 0.88,  $R^2 = 0.78$ ). All regression slopes for A549 cells are significantly positive ( $p < 0.01$ ; 6 hpi: slope = 0.71,  $R^2 = 0.68$ ; 12 hpi: slope = 0.61,  $R^2 = 0.44$ ; 18 hpi: slope = 0.48,  $R^2 = 0.49$ ). (B) The time-dependent, linear input-dependent model of virus production fit to virus output data from MDCK cells at the indicated timepoints. (C) Visualization of the time-dependent, linear input-dependent model of virus production from infected MDCK cells, parameterized with values shown in Table S3. Rates of virus production are shown over time for cells with virus input of  $i = 1, 4,$  and  $8$ . (D). Same as panel (B) but for A549 cells. (E) Visualization of the time-dependent, input-independent model of virus production rate from infected A549 cells.

266  
267

268 These results suggest that the rate of virus production increases over time. Therefore, we next  
269 considered a set of time-dependent models of virus production rate. Specifically, in these models  
270 we allowed for a time delay in virus production to account for the eclipse phase of infection.  
271 Following this delay, the rate of virus production was assumed to depend linearly on time. Input-  
272 dependency on the rate of virus production was incorporated differently by the three different time-  
273 dependent models. The first time-dependent model assumed that the rate of virus production was  
274 input-independent but increased linearly in time following the initial delay in virus production.  
275 When fit to the MDCK cell data, this model underestimated the amount of virus produced at high  
276 MOI values (Fig S6). We next considered a linear input-dependent model in which the rate of  
277 virus production (at any given point in time following the delay in virus production) increases  
278 linearly with the number of viruses infecting a given cell. In MDCK cells, this time-dependent  
279 model with linear input-dependent virus production rate was more supported by the data than the  
280 input-independent model (Table S3). Lastly, we considered a saturating input-dependent model

281 of virus production. In this model, at any given time point following the delay in virus production  
282 the rate of virus production increases with the cellular MOI, saturating at high levels of cellular  
283 MOI. The parameter estimates from fitting the model to MDCK virus production data gave similar  
284 model fits as the linear input-dependent model. However, due to the increased complexity of this  
285 model, the saturating input-dependent model had less statistical support than the linear input-  
286 dependent model (**Table S3**).

287  
288 Of the models considered for MDCK cells, we find that the time-dependent model with linear input-  
289 dependent virus production rate is best supported by the data. This model captures virus  
290 production vs. bulk MOI well at 12 and 18 hpi, but we do note discrepancies at 6 hpi between the  
291 fit of this model and the experimental data (**Fig 4B**). At 6 hpi, virus output at low bulk MOI is lower  
292 than that predicted by the model, while virus output at high bulk MOI is higher than that predicted  
293 by the model. This indicates that the delay in virus production may be longer for cells with low  
294 virus input than with higher virus input. A model that allows for the onset times of viral production  
295 to depend on cellular MOI may therefore better capture the relationship between viral output and  
296 cellular MOI at this early time point. Our overall results are consistent with previous reports of  
297 earlier and higher rates of replication under high experimental MOI conditions (19,20).

298  
299 For A549 cells, we considered the same set of time-dependent virus production rate models. In  
300 contrast to MDCK cells, we did not find that virus production rates depended on virus input; the  
301 input-independent model was most supported by the data (**Table S4; Fig 4D,E**). The linear input-  
302 dependent model both overestimated viral output at high bulk MOI values at 6 and 12 hpi and  
303 underestimated output at low bulk MOI values at 18 hpi (**Fig S7**). The saturating input-dependent  
304 model yielded a slightly better fit to the data than the input-independent model, but due to its  
305 increased model complexity had less statistical support (**Table S4**). The statistically preferred  
306 input-independent virus production model reproduces the experimental data well at 6 hpi;  
307 however, we note that the model slightly overestimates viral output at 12 hpi and underestimates  
308 the output at 18 hpi (**Fig 4D**). This suggests that the rate of virus production may level off over  
309 time, instead of continuing to increase as assumed by our model structure. Similar to MDCK cells,  
310 all models fit to A549 cell data indicate that the onset of virus production occurs at approximately  
311 5 hpi (**Table S4; Fig 4E**). In contrast to MDCK cells, though, we find that the rates of virus  
312 production in A549 cells do not increase with cellular MOI, revealing that the relationship between  
313 cellular MOI and viral output is cell type-specific.

### 314 315 **Increased cellular co-infection enhances the efficiency of viral progeny production in** 316 **MDCK cells but not in A549 cells**

317 To control for the differences in input genomes across the different bulk MOI conditions, we  
318 calculated per capita virus production by dividing the number of output viral genomes by the  
319 number of input genomes (**Fig 5**). For MDCK cells, increasing the bulk MOI significantly increased  
320 per capita virus output at 6 hpi ( $R^2 = 0.71$ ,  $p < 0.0001$ ). However, this positive correlation between  
321 bulk MOI and per capita virus output was no longer apparent at later timepoints (12 hpi  $p = 0.47$ ;  
322 18 hpi  $p = 0.38$ ), likely due to the eventual saturation of virus production rates at high cellular  
323 MOIs. Importantly, MDCK cells infected at higher bulk MOI crossed the threshold into positive  
324 virus production (virus output/input  $> 1$ ) by 6 hpi, while the lower MOI infections lagged. In contrast,  
325 increasing bulk MOI had no significant effects on per capita virus output from A549 cells at 6 hpi  
326 and 12 hpi ( $p = 0.11$  and  $p = 0.06$ , respectively), and actually decreased per capita output at 18  
327 hpi ( $R^2 0.54$ ,  $p = 0.0029$ ). These results suggest that increasing the number of virions introduced  
328 into a given cell can increase or potentially decrease the efficiency of viral progeny production in  
329 a cell-type specific manner.



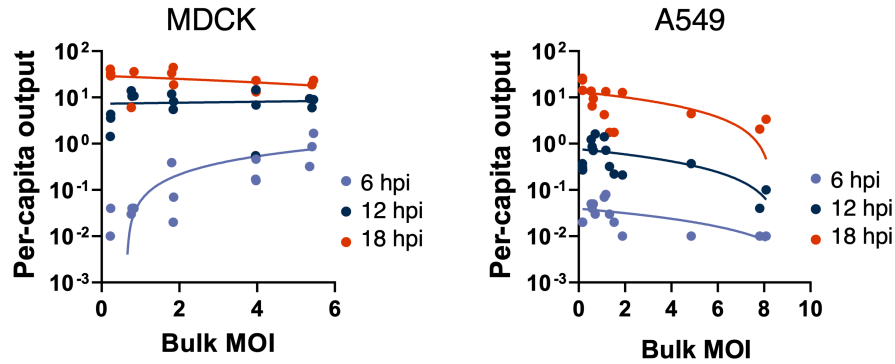

**Figure 5. Cellular co-infection increases the efficiency of virus production in MDCK cells but not in A549 cells.** Per capita virus output calculated as the ratio of output viral genomes over input viral genomes for individual infection replicates at the indicated timepoints vs. bulk MOI for MDCK or A549 cells. Trend lines represent linear regressions performed on the log-log scale for each time point plotted on the semilog scale. P values for the correlations between bulk MOI and per capita virus output at the indicated timepoints are shown.

330  
331

### 332 **Cellular co-infection enhances ISG induction in A549 cells but not MDCK cells**

333 We next asked whether cell type-specific differences in innate immune activation might explain  
334 the divergent effects of cellular MOI on virus output in MDCK and A549 cells. We examined the  
335 effects of increasing cellular MOI on the expression of two interferon stimulated genes (ISGs)  
336 known to inhibit IAV replication (ISG15 and Mx1) (**Fig 6**). In MDCK cells, we found no significant  
337 positive correlations between ISG expression levels and cellular MOI at either timepoint tested  
338 (**Fig 6A**). In A549 cells, expression of ISG15 was positively correlated with bulk MOI at 18 hpi,  
339 but not 8 hpi, while Mx1 expression levels were positively correlated with bulk MOI at both  
340 timepoints (**Fig 6B**). These results suggest that the benefits of increasing cellular MOI for viral  
341 progeny production that we observed in MDCK cells may be offset in A549 cells by increasing  
342 anti-viral ISG activity, thus potentially explaining the divergent effects of cellular MOI on virus  
343 output in these two cell types.

344

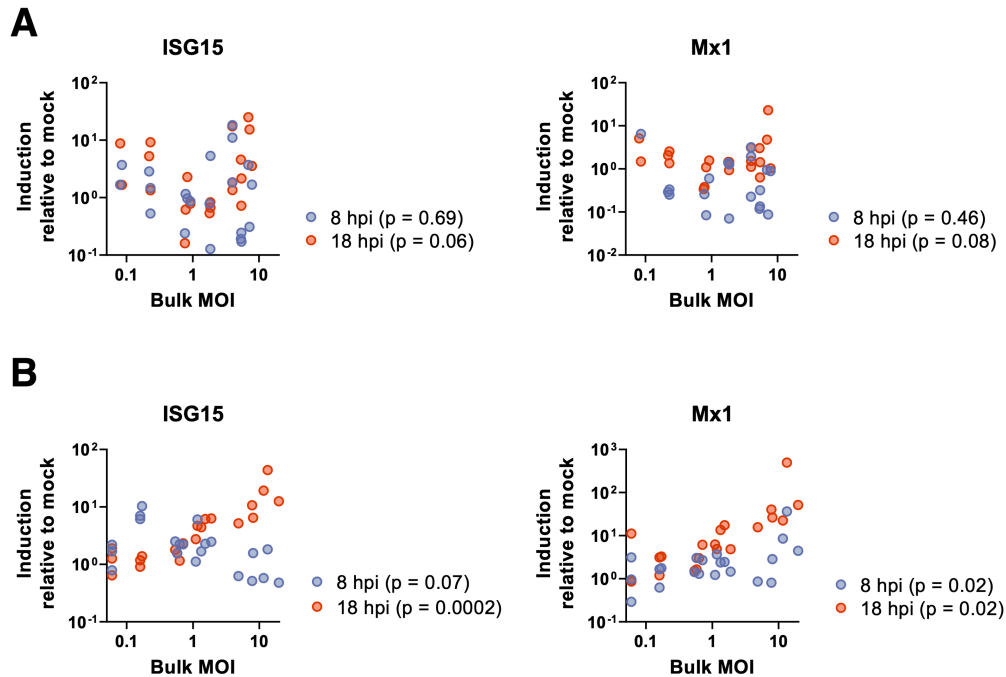

**Figure 6. Cellular co-infection enhances ISG induction in A549 but not MDCK. (A)** MDCK and **(B)** A549 cells were infected with PR8 under single cycle conditions at the indicated bulk MOIs. Levels of cellular ISG15 and Mx1 transcript were measured by RT-qPCR at 8 and 18 hpi, compared to levels in mock cells. P values for the correlations between bulk MOI and fold induction of the indicated ISGs at the indicated timepoints are shown.

345  
346

### 347 Cellular co-infection enhances type III (but not type I) IFN induction in A549 cells

348 A prior study observed that the magnitude of interferon (IFN) transcription during IAV infection is  
349 higher under higher experimental MOI conditions (12); however, this relationship was not  
350 rigorously defined and it was not clear whether this effect simply arose from increases in infected  
351 cell numbers. In contrast, a more recent study suggests that increasing cellular MOI might result  
352 in more potent antagonism of IFN activation (15). To precisely define the effects of cellular co-  
353 infection on IFN induction, we measured the effects of varying bulk MOI on the induction of both  
354 type I (IFNB1) and type III (IFNL1) IFN transcription in both MDCK and A549 cells at 8 and 18 hpi  
355 under single cycle infection conditions.

356

357 For MDCK, expression levels of IFNB1 and IFNL1 in infected cells were barely if at all elevated,  
358 compared with mock cells (**Fig 7A**). We found no significant correlation between bulk MOI and  
359 levels of IFNB1 induction at either time-point tested (log-log linear regression:  $p = 0.38$  for 8 hpi  
360 and  $p = 0.23$  for 18 hpi). For IFNL1, expression was independent of bulk MOI ( $p = 0.67$ ) at 8 hpi;  
361 however, at 18 hpi there was a statistically significant yet modest positive correlation between  
362 bulk MOI and levels of IFNL1 induction (slope = 0.34;  $p = 0.0077$ ).

363

364 In A549 cells, we observed that IFNB1 and IFNL1 expression responded very differently to  
365 increasing bulk MOI. By 8 hpi, IFNB1 expression was significantly elevated above mock under all  
366 MOI conditions (**Fig 7B**); however, there was no correlation between bulk MOI and levels of IFNB1  
367 induction ( $p = 0.81$ ). This suggests that IFNB1 induction, at least in bulk, is independent of MOI  
368 or even the total number of infected cells in the culture. By 18 hpi, we did observe a statistically  
369 significant positive correlation between bulk MOI and IFNB1 induction ( $p = 0.0002$ ); however, this  
370 effect was quite small (slope = 0.16). In contrast to IFNB1 expression, we observed a strong

371 positive correlation between IFNL1 expression and bulk MOI at both 8 and 18 hpi ( $p < 0.0001$  for  
 372 both time points; **Fig 7B**), although the effect was less pronounced at 18 hpi (slope = 0.58)  
 373 compared with 8 hpi (slope = 1.08).  
 374

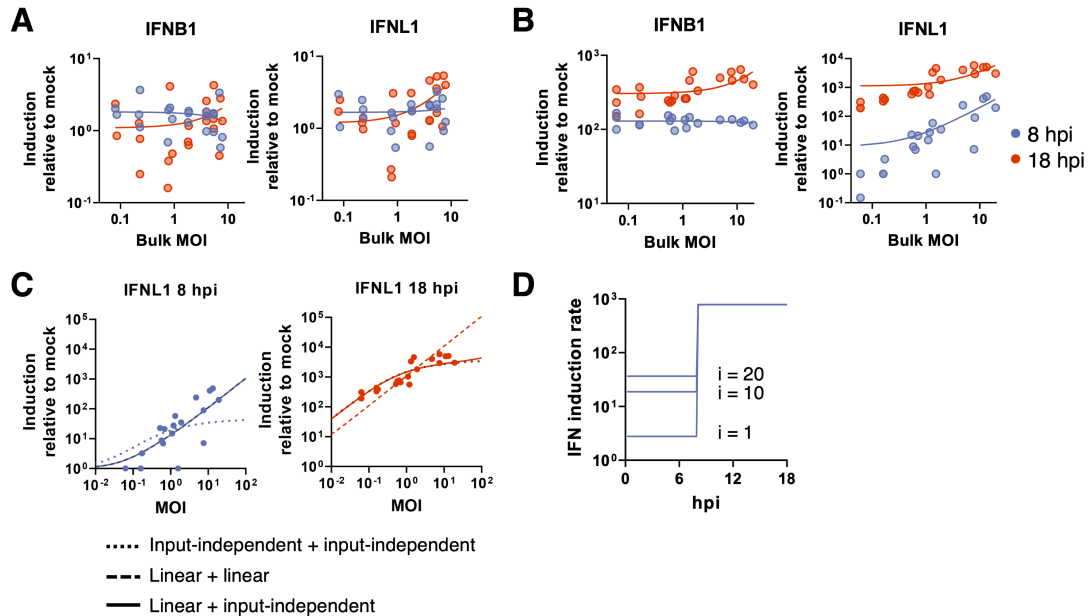

**Figure 7. Cellular co-infection enhances type III (but not type I) IFN induction in A549 cells but has no significant effects on MDCK cell IFN induction.** (A) Levels of cellular IFNB1 and IFNL1 transcript were measured by RT-qPCR at the times indicated in MDCK cells infected with PR8 under single cycle conditions at a range of bulk MOIs. Each data point represents values from a single infection well and lines represent log-log linear regressions. No significant positive correlation between IFNB1 induction and bulk MOI at 8 hpi and 18 hpi ( $p = 0.21$  and  $p = 0.24$ , respectively), and no significant positive correlation between IFNL1 induction and bulk MOI at 8 hpi and 18 hpi ( $p = 0.98$  and  $p = 0.15$ , respectively). (B) Same as in (A) but for A549 cells. No significant correlation between IFNB1 induction and bulk MOI at 8 hpi ( $p = 0.81$ ), but at 18 hpi the slope is significantly non-zero ( $p = 0.0002$ ). For IFNL1, there is a significant positive correlation between normalized IFNL1 induction and bulk MOI at both timepoints ( $p < 0.0001$ ). (C) Three IFN induction model fits to IFNL1 induction data in A549 cells at 8 and 18 hpi. Note that for the 0-8 hr plot, linear+linear and linear+input-independent are overlapping since they are the same for this epoch, and for the 8-18 hr plot, input-independent+input-independent and linear+input-independent are nearly overlapping. (D) IFN induction rates for the linear + input-independent model. From 0-8 hpi, IFN induction rates increase linearly with viral input:  $i = 1, 10, 20$ , and from 8-18 hpi, the IFN induction rate is independent of viral input.

375  
 376

377 To determine whether the observed relationship between bulk MOI and IFNL1 induction in A549  
 378 cells could be explained simply as the result of increasing the number of infected cells, we  
 379 statistically fit several mathematical models to these experimental data. Because only 8 hpi and  
 380 18 hpi data were available for model fitting, we considered different model combinations by  
 381 piecing together a model governing the 0-8 hpi epoch with a model governing the 8-18 hpi epoch.  
 382 During each epoch, we considered three different possible time-independent interferon induction  
 383 rate models (**Table S5**; Methods): (1) an input-independent model in which all infected cells have  
 384 similar IFNL1 induction rates relative to mock cells; (2) an input-dependent model in which IFNL1  
 385 induction rates scale linearly with virus input; and (3) an input-dependent model in which IFNL1  
 386 induction rates increase with virus input, saturating at high input values. The results of fitting these  
 387 models jointly to the 8 hpi and 18 hpi IFNL1 induction data are shown in **Table S6**.  
 388

389

390 The best fitting model had IFNL1 expression in A549 cells be linearly dependent on cellular input  
 during the 0-8 hr epoch, while being independent of cellular input during the 8-18 hr epoch. **Figure**

391 **7C** shows this combined model fit to the data, along with two other model combinations for  
392 comparison. A model assuming input-independence during both epochs does poorly in  
393 reproducing the 8 hpi data; in fact, all models with input-independence during the 0-8 hpi epoch  
394 do poorly (**Table S6**). A model that instead assumes linear input-dependence during both epochs  
395 can reproduce the 8 hpi data but does poorly at reproducing the 18 hpi data (**Fig 7C**). In **Fig 7D**  
396 we show graphically what the most supported IFN induction model looks like, for IFNL1 induction  
397 in A549 cells. Early in the infection (<8 hpi), the rate of IFNL1 induction depends linearly on cellular  
398 MOI, such that cells with higher levels of virus input have higher rates of IFNL1 induction than  
399 cells with lower levels of virus input. However, later in the infection (>8 hpi), the rate of IFNL1  
400 induction does not depend on virus input. These results are consistent with a mechanism by which  
401 increasing cellular MOI accelerates the intra-cellular accumulation of viral replication products,  
402 resulting in earlier, more robust detection by RIG-I or other innate sensing pathways and a higher  
403 bulk rate of IFNL1 induction early during infection.

404

#### 405 **Cellular co-infection decreases the potential for superinfection.**

406 Finally, we wanted to understand how cellular coinfection may affect the potential for cellular  
407 superinfection. We previously showed that under low bulk MOI conditions in multiple cells lines,  
408 increasing the number of functional gene segments delivered to a given cell resulted in more  
409 potent superinfection exclusion (SIE), limiting the potential for cellular co-infection in a cell-type  
410 independent manner (21). We thus hypothesized that increases in cellular MOI would shorten the  
411 time window during which superinfection is possible, thus limiting the total number of virions that  
412 can successfully infect a given cell.

413

414 To define how cellular MOI affects subsequent superinfection potential, we measured the extent  
415 of SIE across a range of bulk MOIs in MDCK cells. We generated 2 antigenically distinct  
416 reassortant viruses (rH3N1 and rH1N2) that could be differentiated using specific monoclonal  
417 antibodies. We infected MDCK cells with rH3N1 at a range of intended MOIs resulting in groups  
418 with average bulk MOIs of 0.25, 1.13, 3.00, 15.43, and 53.72 TCID<sub>50</sub>/cell (based on subtracting  
419 post-adsorption inoculum GE titers from pre-adsorption inoculum titers as detailed above). At 6  
420 hpi, we superinfected with a constant bulk input MOI of rH1N2. To measure the baseline co-  
421 infection rates in the absence of SIE effects, we included co-infection controls for each input MOI  
422 where we simultaneously co-infected with rH3N1 and rH1N2 viruses. At 19 hpi, we examined the  
423 infection status of cells by flow cytometry, using H3 and H1 expression as markers of rH3N1  
424 infection and rH1N2 infection, respectively.

425

426 As expected, during simultaneous co-infection (where no SIE occurs), we observed that the  
427 fraction of co-infected cells (H3+H1+) increased with the input MOI of rH3N1 virus and plateaued  
428 when almost all rH1N2-infected cells (H1+) were co-infected with rH3N1 (**Fig 8A**). These  
429 simultaneous co-infection data allowed us to develop and parameterize an appropriate “null”  
430 model of co-infection in the absence of SIE (**Methods**). To capture the possibility of  
431 overdispersion of viral particles (which we found to be important when analyzing cell death rates),  
432 the null model assumed that cells could belong to either a low susceptibility class of cells or a  
433 high susceptibility class of cells. **Fig 8A** shows the fit of this null model to the data.

434

435 In contrast to what was observed under simultaneous co-infection conditions, under  
436 superinfection conditions we observed that the fractions of both double-infected (H3+H1+) cells  
437 and rH1N2-infected (H1+) cells decreased with increasing rH3N1 input MOI. To determine  
438 whether these patterns could simply be explained by higher numbers of cells being infected with  
439 rH3N1 at higher rH3N1 input MOIs, we assessed how well two different models of super-infection

440 fit the experimental data (Methods). The first model assumed that all rH3N1-infected cells had the  
441 same reduced probability of becoming infected with rH1N2 (input-independent). The second  
442 model assumed that the probability of being infected with rH1N2 decreased with cellular rH3N1  
443 MOI (input-dependent). Similar to the coinfection null model, both models assumed that cells fall  
444 into either a high or low susceptibility class. We fit each of these two models to the SIE data. The  
445 input-independent model underestimated the extent of rH1N2 infection to a greater extent than  
446 the input-dependent model (**Fig 8B**). The input-independent model further systematically  
447 underestimated the extent of double (H3+H1+) infection at low rH3N1 input MOI, while  
448 systematically overestimating these measurements at high rH3N1 input MOI (**Fig 8B**). In contrast,  
449 the input-dependent model was better able to reproduce the double (H3+H1+) infection  
450 measurements across all experimental MOIs (**Fig 8B**). As anticipated from these patterns, we  
451 found that the input-dependent model was significantly better supported by the data than the  
452 input-independent model (**Table S7**). **Fig 8C** shows the relationship between cellular input and  
453 susceptibility to superinfection predicted by this input-dependent model, indicating a rapid decline  
454 in susceptibility to superinfection with rH1N2 at 6 hpi at increasing levels of rH3N1 virus input.  
455

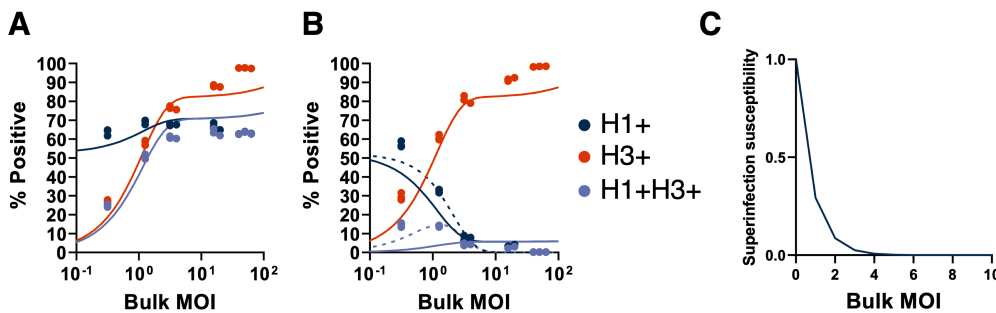

**Figure 8. Cellular co-infection decreases the potential for superinfection. (A)** MDCK cells were simultaneously coinfecting with rH1N2 (at a constant MOI) and rH3N1 (at varying input MOIs shown; x-axis) under single cycle conditions; SIE would not be expected to occur during simultaneous coinfection. Plot shows the percentages of all cells infected with rH1N2 (H1+; includes co-infected cells; dark blue), all cells infected with rH3N1 (H3+; includes co-infected cells; red), and cells coinfecting with both (H3+H1+; light blue), as determined by flow cytometry at 19 hpi. Solid lines indicate the two-susceptibility state null model fit to these data. **(B)** MDCK cells were infected with rH3N1 at varying input MOIs (x-axis) under single cycle conditions. 6 hours later, cells were superinfected with rH1N2 at an intended MOI of 0.5 TCID<sub>50</sub>/cell. Percentages of cells that were H1+ (including cells co-infected with rH3N1), H3+ (including cells co-infected with rH1N2), and H3+H1+ were determined by flow cytometry at 19 hpi. Lines indicate statistical fits of the input-independent (solid) and input-dependent (dashed) models. **(C)** Visualization of the input-dependent model of superinfection susceptibility where the susceptibility of infected cells to superinfection is shown relative to the susceptibility of uninfected cells.

456  
457

458 These results are consistent with our previous finding that susceptibility to superinfection is  
459 inversely correlated with the cellular dosage of replication complexes delivered by incoming  
460 virions (21). Thus, the MOI-dependence of SIE may serve as a negative feedback loop that  
461 restricts the maximum number of virions that can successfully infect a given cell.

462

## 463 DISCUSSION

464 In this study, we defined the functional consequences of cellular co-infection by quantifying the  
465 effects of cellular MOI on the phenotypes of infected cells. We combined precise, quantitative  
466 single-cycle *in vitro* infection experiments with statistical model fitting to demonstrate that at the  
467 cellular level, variation in viral input gives rise to substantial variation in infection outcomes. This  
468 includes cell line-dependent variation in viral output dynamics as well as the host transcriptional  
469 response to infection. Intriguingly, type I and type III IFN exhibited distinct responses to increases  
470 in MOI, suggesting that variation in cellular MOI could alter the balance of these two antiviral



471 cytokines. Altogether, these results clearly suggest that the incidence of cellular co-infection could  
472 play an important role in influencing influenza virus infection outcome.

473  
474 These results complicate the common understanding of viral genotype-phenotype relationships.  
475 Generally, we understand that the phenotype of a virus within a given host system is encoded by  
476 its genome sequence. Our data add another layer to this view: it is not simply the sequence(s) of  
477 a viral genome that influences its phenotype but also how those sequences are distributed across  
478 cells. Two viruses with identical genome sequences could exhibit significantly different replication  
479 dynamics or patterns of IFN induction if they differ in their cellular MOI distribution (22,23). These  
480 results suggest that we need to better understand the forces that govern the extent of cellular co-  
481 infection and the spatial distribution of virions during IAV infection.

482  
483 Our finding that the relationship between cellular MOI and viral replication efficiency differed  
484 between cell types complements the results of two recent reports. In the first, Andreu-Moreno et  
485 al. examined the effect of cellular co-infection on vesicular stomatitis virus (VSV) fitness across  
486 multiple cell types (22). They found that increasing cellular MOI (via virion aggregation) enhanced  
487 viral fitness, but that the magnitude of this effect varied between cell types. Specifically, they  
488 observed an inverse relationship between the susceptibility of a given cell line to VSV infection  
489 and the extent to which cellular co-infection enhanced viral output. Similarly, Phipps et al.  
490 observed that cellular co-infection could enhance influenza virus replication when the virus strain  
491 used was poorly adapted to the cell line used (20). Along with these studies, our results illustrate  
492 the importance of considering variation between cell types. This point is especially relevant given  
493 the diversity of cell types infected by IAV *in vivo*. Beyond cell type variation, it is likely that other  
494 viral genotypes will exhibit quantitative or qualitative differences in the dynamics that we have  
495 measured here. Thus, we do not argue that our specific results will describe all combinations of  
496 influenza virus strains and target cell types. Instead, our results identify cellular co-infection as an  
497 important determinant of viral replication dynamics and immune activation and provide a rigorous  
498 quantitative framework for future efforts to understand the consequences of co-infection.

499  
500 It is important to point out that the experimental data described here were all collected from  
501 aggregate populations of cells and that our models ignore single cell heterogeneity between cells  
502 with the same cellular MOI. There is substantial heterogeneity in viral gene expression and  
503 progeny production between individual cells infected under similar conditions (24–27). Time-  
504 course experiments from single poliovirus-infected cells have demonstrated that bulk  
505 measurements like those used here can obscure more complex, heterogeneous dynamics that  
506 occur at the single cell level (28). A more complete understanding of the functional consequences  
507 of cellular co-infection will likely depend upon future studies that quantify single cell variability.

508  
509 The IFN system represents one of the earliest and most potent lines of defense against IAV within  
510 the respiratory tract (29–31). Similar to previous reports, we observed that IAV infection resulted  
511 in a more dramatic induction of type III IFN (32), compared with type I IFN, in A549 cells. We were  
512 surprised to find that type I and type III IFN induction responded differently to increases in input  
513 MOI, as the induction pathways that lead to initiation of IFNB1 and IFNL1 are thought to largely  
514 overlap (33). Our data suggest that the induction or regulatory circuitry for these two pathways  
515 are differentially affected by the amount of viral input. Even more surprising was our finding that  
516 type I IFN induction was largely insensitive to input MOI over two orders of magnitude. In our  
517 hands, not only was IFNB1 induction MOI-independent at the cellular level, it was also largely  
518 unaffected by the total number of infected cells, which ranged from ~3% to ~63% across the  
519 samples tested. Induction of IFNB1 expression by IAV is known to be highly stochastic at the

520 single cell level and many infected cells do not upregulate IFN expression (15,24,34); however, it  
521 is still counterintuitive that increasing the total number of infected cells would not increase the  
522 overall number of cell producing IFNB1 (and thus the bulk expression level). More work is clearly  
523 needed to understand the factors that govern IFN expression at the single cell level.

524  
525 The implications of these results for understanding what happens during natural infection remain  
526 unclear, but at a minimum suggest that frequent occurrence of cellular co-infection is likely to  
527 boost the magnitude of the type III, but not the type I IFN response. This dynamic could lead to  
528 MOI-dependent changes in the relative balance of type I versus type III IFN induction which could  
529 be consequential given that these cytokine families can trigger non-redundant effector responses  
530 during IAV infection (35–38). One important caveat here is that we are only examining IFN  
531 induction within a single cycle of replication and a single cell type and patterns of type I and type  
532 III IFN induction over the course of infection are sure to be much more complicated.

533  
534 Given that cellular MOI and co-infection have clear functional consequences during IAV infection,  
535 it is critical to quantify the actual occurrence of cellular co-infection during *in vivo* infection and to  
536 identify host and viral determinants of cellular co-infection frequency. Natural infections are likely  
537 typically initiated under low MOI conditions due to the relatively small size of transmitted founder  
538 populations (though even small numbers of transmitted virions could achieve high cellular MOI if  
539 they are physically aggregated) (39,40). Even if infection is initiated at low cellular MOI, high  
540 cellular MOI conditions could be very rapidly established if viral spread is locally restricted, as  
541 appears to be the case (8). This idea is supported by a recent study that demonstrated a virus  
542 that is entirely dependent upon cellular co-infection to replicate can successfully replicate in  
543 guinea pigs (7). Though very few studies have attempted to actually quantify the MOI distribution  
544 *in vivo* because of the inherent technical challenges, our work suggests that this feature could be  
545 an important, underappreciated determinant of infection outcome.

546  
547 This study also highlights the power of interfacing carefully quantified experimental data with  
548 statistical modeling approaches. By fitting models to our experimental data, we were able to  
549 rigorously test our hypotheses concerning the phenotypic effects of cellular MOI to an extent that  
550 would not be possible based on standard data analysis. This was essential for confidently  
551 distinguishing between the different functional forms that could potentially describe the phenotypic  
552 consequences of different levels of virus input. Hopefully, the data generated here will help inform  
553 future mathematical modeling efforts focused on understanding IAV within-host infection  
554 dynamics. Our results to date certainly suggest that future model structures may better capture  
555 the underlying biology of IAV infection if they account for the phenotypic consequences of cellular  
556 co-infection (41,42).

557  
558 Altogether, our results clearly demonstrate that cellular MOI can have concrete effects on infection  
559 outcome, highlighting the functional importance of collective interactions during IAV infection (43).  
560 At a minimum, our data establish that the distribution of viral genomes across cells and the  
561 patterns of cellular co-infection that result can significantly alter emergent viral infection  
562 phenotypes. This suggests that future efforts to understand influenza virus infection dynamics  
563 and outcomes should consider patterns of virus input and cellular co-infection.

## 564 **MATERIALS AND METHODS**

### 565 **Cells**

566 HEK293T (human embryonic kidney) cells were used for rescue of PR8 by plasmid transfection.  
567 MDCK (Madin-Darby canine kidney) cells were used for virus propagation, TCID<sub>50</sub>, and infection  
568

569 experiments. 293T and MDCK were maintained in MEM (Thermo Fisher Scientific) supplemented  
570 with 8.3% fetal bovine serum (FBS). A549 (human lung carcinoma) cells were used for infection  
571 experiments and were maintained in Ham's F12 nutrient mixture (Thermo Fisher Scientific) with  
572 8.3% FBS.

573

### 574 **Virus rescue and propagation**

575 Eight plasmids encoding the A/Puerto Rico/8/1934 (H1N1; PR8) segments PB2, PB1, PA, HA,  
576 NP, NA, MA, and NS in the dual promoter pDZ vector were used to generate recombinant virus  
577 stocks through standard IAV reverse genetics. The recombinant PR8 virus (rPR8) differs from the  
578 published sequence (GenBank accession nos. AF389115–AF389122) at two positions: PB1  
579 A549C (K175N) and HA A651C (I207L) (numbering from initiating Met). rH3N1 and rH1N2 viruses  
580 used in superinfection studies were similarly generated through reverse genetics, using the HA  
581 and NA segments from A/Udorn/307/72 (H3N2) respectively and the remaining segments from  
582 PR8.

583

584 For virus rescue, 500 ng of each plasmid were mixed with 200  $\mu$ L jetPRIME buffer (Polyplus-  
585 transfection) and 8  $\mu$ L jetPrime reagent and incubated at room temperature for 10 minutes. The  
586 transfection mixture was added dropwise to 293T cells at 60% confluency in 6-well cell culture  
587 plates and incubated at 37°C, 5% CO<sub>2</sub>. Media was changed 18-24 hours post-transfection, with  
588 2 mL of virus growth media (MEM, 1 mM HEPES, 1  $\mu$ g/mL TPCK trypsin (Worthington  
589 Biochemical Corporation; Lakewood, NJ, USA), 50  $\mu$ g/mL gentamicin) containing  $2.5 \times 10^5$  MDCK  
590 cells. Rescue supernatant was harvested and used in plaque assay. Briefly, 300  $\mu$ L 10-fold serially  
591 diluted transfection supernatant in 1X DPBS (+Ca/+Mg), 0.1% BSA, pH 7.1, was added per 100%  
592 confluent MDCK well in 6-well cell culture plate, in duplicate. After 1 hour of incubation, 3 mL  
593 agarose overlay (0.9% agarose, 1X EMEM, 1  $\mu$ g/mL TPCK trypsin, 0.2% BSA, 1X glutamax, 1  
594 mM HEPES, 50  $\mu$ g/mL gentamicin) was added to each well and incubated for 48-72 hours at  
595 37°C.

596

597 To generate seed virus stocks, three isolated plaques were picked and resuspended in 200  $\mu$ L 1X  
598 DPBS (+Ca/+Mg), 0.1% BSA; 100  $\mu$ L was added to one well of 6-well cell culture plate with 80%  
599 confluent MDCK cells with 2 mL of virus growth media and incubated at 37°C, 5% CO<sub>2</sub> for 48-72  
600 hours. To generate working stock virus, confluent MDCK cells were infected with seed virus stock  
601 at an MOI of 0.001 TCID<sub>50</sub>. One-hour post infection, inoculum was discarded and replaced with  
602 virus growth media and incubated at 37°C, 5% CO<sub>2</sub> for 48-72 hours. Supernatant was clarified at  
603 3000 RPM for 10 minutes and 500  $\mu$ L aliquots were stored at -70°C.

604

605 50% tissue culture infective dose (TCID<sub>50</sub>) for PR8 viral supernatant was titrated in 96-well cell  
606 culture plates with 100% confluent MDCK cells by 1:10 serial dilution in virus growth media.  
607 Cytopathic effect was visualized 3-5 days post infection. TCID<sub>50</sub> values were calculated based on  
608 Reed and Munch calculation (44).

609

### 610 **Viral output assay**

611 To precisely quantify the effects of viral input on viral output and cell death rates, PR8 was diluted  
612 in 1X PBS +/- pH 7.3 in 200  $\mu$ L triplicates to yield intended MOIs of 0.25, 1, 2.5, 5, and 25 and  
613 used to inoculate MDCK or A549 cells in 24-well plates. Infections were synchronized by carrying  
614 out adsorption at 4°C for 1 hour. The supernatant was collected at 1 hpi, the cell monolayers were  
615 washed three times with 1X PBS, media was replaced with 500  $\mu$ L MEM or F12, for MDCK and  
616 A549 respectively, with 8.3% FBS and cells were shifted to 37°C. At 2 hpi, media was  
617 supplemented with 20 mM NH<sub>4</sub>Cl to block secondary spread of the virus (45). Total viral

618 supernatant was collected at 3, 6, 12, and 18 hpi and stored for at -70°C for later use. Cell  
619 monolayers were then trypsinized and either stained with trypan blue and manually counted with  
620 a bright-line hemocytometer (to quantify remaining live cells) or prepared directly for flow  
621 cytometry.

622

### 623 **Quantification of infected cell percentages**

624 To quantify infected cells, cells in suspension were transferred to 96-well plate round bottom plate,  
625 centrifuged for 5 minutes at 1000 RPM, and the supernatant was removed by one quick flick.  
626 Cells were washed once with 200  $\mu$ L 1X PBS with 0.1% BSA, then 200  $\mu$ L 1X FoxP3 transcription  
627 factor fixation/permeabilization (Thermo Fisher Scientific) was added to each well and incubated  
628 on ice for 30 minutes or 4°C overnight while protected from light. Cells were then washed three  
629 times with perm wash, 1X PBS with 0.1% BSA and 0.1% saponin. 100  $\mu$ L primary monoclonal  
630 antibodies anti-HA (H28-E23-AF488) and anti-NP (HB65-AF647) were incubated with each  
631 sample for 30 minutes on ice, washed three additional times to remove unbound antibody, and  
632 resuspended in 200  $\mu$ L perm wash. Labeled cells were immediately analyzed with BD LSR II flow  
633 cytometer (BD Biosciences) and FlowJo version 10.4 software package (FlowJo, LLC). Positively  
634 infected cells are any cells that expresses one or both protein of interest (HA or NP); mock infected  
635 cells were used to gate for negatively infected cells. The negative gate for MDCK cells at MOI  
636 5.35, 5.41, and 5.45 was shifted to account for the shift in fluorescence seen in uninfected cells.

637

### 638 **Measurement of viral genome equivalents by RT-qPCR**

639 Viral RNA was isolated from viral supernatant with Zymo vRNA 96-well extraction kit (Zymo  
640 Research) according to manufacturer's instructions, eluted with 30  $\mu$ L RNase free water, and  
641 stored at -70°C. For cDNA synthesis, 5  $\mu$ L vRNA, 0.5  $\mu$ L 10 mM dNTP mix (Sigma-Aldrich), and  
642 1.0  $\mu$ L Uni12(46) (AGCAAAAGCAGG) were incubated at 65°C for 5 minutes then transferred to  
643 ice for 2 minutes. 1  $\mu$ L SUPERase In RNase inhibitor (20 U/ $\mu$ L; Thermo Fisher Scientific) was  
644 added to each mixture and incubated on ice again for 2 minutes. 6.5  $\mu$ L dH<sub>2</sub>O, 4  $\mu$ L 5X First-  
645 Strand Buffer, 1  $\mu$ L 100 mM DTT, and 1  $\mu$ L SuperScript III RT (200 U/ $\mu$ L; Thermo Fisher Scientific)  
646 were added to each reaction and incubated at 55°C for 60 minutes and heat inactivated at 70°C  
647 for 15 minutes.

648

649 Genome equivalents (GE) were estimated by RT-qPCR of MA gene segment. In duplicate for  
650 each sample, 10  $\mu$ L Power SYBR Green PCR master mix (Thermo Fisher Scientific), 0.5  $\mu$ L 10  
651  $\mu$ M forward and reverse primers (MA-Forward: ACAGAGACTTGAAGATGTC and MA-Reverse:  
652 TCTTTAGCCATTCCATGAG), 8  $\mu$ L dH<sub>2</sub>O, and 1  $\mu$ L cDNA were added to 0.2 mL MicroAmp  
653 Optical 96-well reaction plate (Thermo Fisher Scientific). RT-qPCR was performed on the  
654 QuantStudio 3 (Thermo Fisher Scientific) platform and the cycling conditions were as follows:  
655 95°C for 10 minutes, 40 cycles of 95°C for 15 seconds and 60°C for 60 seconds. The standard  
656 curve established with pDZ-PR8 MA plasmid (R<sup>2</sup> of 0.9992) was used to estimate GE/ $\mu$ L and then  
657 each sample was corrected for dilution factor to give a final GE/mL.

658

### 659 **Superinfection assay**

660 For the 6hr superinfection group, confluent MDCK cells in six-well plates were infected with rH3N1  
661 virus at intended MOIs of 0.05, 0.25, 1, 2.5, and 10 TCID<sub>50</sub>/cell respectively at 4°C. 1 hour post-  
662 adsorption, remaining inoculum was collected, monolayers were washed with PBS and incubated  
663 in MEM + 8.3% FBS. At 6 hpi, monolayers were superinfected with rH1N2 at MOI=0.5 TCID<sub>50</sub>/cell  
664 at 4°C. One hour post-adsorption, monolayers were washed with PBS and incubated in MEM +  
665 8.3% FBS. At 9 hpi of rH3N1 (3 hpi of rH1N2), the media was changed to MEM with 50 mM  
666 HEPES and 20 mM NH<sub>4</sub>Cl to block spread of both viruses. For the 0hr co-infection group, cells



667 were infected with a mixture of rH3N1 and rH1N2 at the same MOIs as in 6hr superinfection group.  
668 At 3 hpi, 20 mM NH<sub>4</sub>Cl was added to block viral spread. For both 0hr and 6hr groups, at 19 hpi  
669 of rH3N1 (13 hpi of rH1N2), cell monolayers were trypsinized into single-cell suspensions and  
670 stained with Alexa Fluor 647-conjugated mouse anti-N1 mAb NA2-1C1 and Alexa Fluor 488-  
671 conjugated mouse anti-H1 mAb H28-E23 (gifts of Dr. Jon Yewdell). After staining, cells were  
672 washed with PBS, run on a BD LSR II, and analyzed using FlowJo version 10.1 (Tree Star, Inc.).  
673 To quantify actual MOIs, virus present in both pre- and post-adsorption inoculum was quantified  
674 by RT-qPCR as above using the following primers specific for the N1 segment:  
675 AAATCAGAAAATAACAACCATTGGA, ATCCCTATTTGCAATATTAGGCT.

676

### 677 Interferon quantification and interferon stimulated gene quantification

678 Interferon β1 (IFNB1) and interferon λ1 (IFNL1) and interferon stimulated genes (ISG15 and Mx1)  
679 induction was quantified during infection of MDCK and A549 cells with PR8 at intended MOIs of  
680 0.1-100. In brief, MDCK and A549 cells in 24-well plate were inoculated for one-round of  
681 replication, as described above. At 8 or 18 hpi, supernatant was removed, cells were washed  
682 thoroughly, dissociated from the plate, and cellular mRNA was extracted with RNeasy Mini kit  
683 (QIAGEN), according to manufacturer's instructions. Reverse transcription was completed with  
684 SuperScript III first-strand synthesis system for RTq-PCR (Thermo Fisher Scientific). Briefly, 8 μL  
685 cellular mRNA was incubated with 2.5 ng/μL random hexamers, and 0.5 nM dNTP mix at 65°C  
686 for 5 minutes then placed on ice for 1 minute. Then 1X RT buffer, 5 mM MgCl<sub>2</sub>, 0.01 M DTT, 2  
687 U/μL RNaseOUT, and 10 U/μL SuperScript III RT were added to each sample and incubated at  
688 25°C for 10 minutes, 50°C for 50 minutes, and 85°C for 5 minutes; finally 1 μL RNase H was  
689 added and incubated at 37°C for 20 minutes. With cellular cDNA for A549, TaqMan gene  
690 expression assays (FAM-MGB; Thermo Fisher Scientific) specific for IFNB1 and IFNL1 were used  
691 in multiplex with TaqMan GAPDH control reagents kit (JOE-TAMRA; Thermo Fisher Scientific).  
692 Briefly, in duplicate 2 μL cellular cDNA was added to 2 μL TaqMan Fast Advanced Master Mix, 1  
693 μL either IFNB1 or IFNL1 TaqMan Gene expression assay, 100 nM GAPDH forward and reverse  
694 primers, 200 nM GAPDH TaqMan probe, and dH<sub>2</sub>O in 20 μL. RTq-PCR was performed on the  
695 QuantStudio 3 platform and the cycling conditions were as follows: 95°C for 20 seconds, 40 cycles  
696 of 95°C for 1 second and 60°C for 20 seconds. For the remaining targets of both MDCK and A549,  
697 primers were used for SYBR green chemistry (see **Table S8**), with β-actin as an endogenous  
698 control. Briefly, in duplicate 2 μL cellular cDNA was added to 10 μL PowerUp SYBR Green Master  
699 Mix (Thermo Fisher Scientific), 250 nM of each forward and reverse primers, and dH<sub>2</sub>O in 20 μL.  
700 RTq-PCR was performed on the QuantStudio 3 platform and the cycling conditions were as  
701 follows: 95°C for 10 minutes, 40 cycles of 95°C for 15 seconds and 60°C for 1 minute, followed  
702 by melt curve analyses of 95°C for 15 seconds, 60°C for 1 minute and 95°C for 1 second. Induction  
703 of IFN and ISG was quantified by the fold change of infected cells from mock infected cells.

704

### 705 Statistical modeling of cell death

706 To infer infected cell death rates from experimental data, and to determine whether these rates  
707 are time-dependent and/or virus input-dependent, we fit the following general model to the  
708 experimental data points from 3, 6, 12, and 18 hpi:

709

$$710 \#CellsSurviving(t, bulkMOI) = N_{Cells} \cdot \exp(-\mu t) \cdot \left( p_0(bulkMOI) + \sum_{i=1}^{\infty} p_i(bulkMOI) \cdot \exp\left(-\int_0^t \alpha(s, i) ds\right) \right). \quad (1)$$

711



712 In this equation,  $N_{\text{cells}}$  denotes the initial number of cells on the plate, the parameter  $\mu$  denotes the  
713 background death rate of (both infected and uninfected) cells, and  $\alpha(s, i)$  is the general form for  
714 the instantaneous death rate of cells at time  $s$  since infection, infected with viral input  $i$ .

715  
716  $p_i(\text{bulkMOI})$  denotes the initial fraction of the cell population that has viral input  $i$ , which depends  
717 on the actual bulk MOI and the model specifying the distribution of viruses across cells. We  
718 included a background cell death rate  $\mu$  because we noted a small (but non-negligible) amount of  
719 cell loss in mock infected (uninfected) cells. Because of uncertainty in the initial number of cells,  
720 we estimate  $N_{\text{cells}}$  along with the other parameters in the model fitting to experimental data.

721 This expression assumes that uninfected cells ( $i = 0$ ) survive the time course of the experiment  
722 with probability  $\exp(-\mu t)$ . The probability of infected cells with viral input  $i$  surviving up to time  $t$  is

723 given by the survival function,  $\exp(-\mu t) \cdot \exp\left(-\int_0^t \alpha(s, i) ds\right)$ . The percent of surviving cells that are

724 infected at time  $t$  is given by

725 
$$\% \text{InfectedCells}(t, \text{bulkMOI}) = 100 \cdot \left( \frac{\sum_{i=1}^{\infty} p_i(\text{bulkMOI}) \cdot \exp\left(-\int_0^t \alpha(s, i) ds\right)}{p_0(\text{bulkMOI}) + \sum_{i=1}^{\infty} p_i(\text{bulkMOI}) \cdot \exp\left(-\int_0^t \alpha(s, i) ds\right)} \right). \quad (2)$$

726 For each of the four cell death rate models listed in **Tables S1** and **S2**, we estimated the  
727 parameter  $\mu$  and the parameters of  $\alpha(s, i)$  by simultaneously fitting models to the time course data  
728 on the number of cells surviving and to the flow data on the percent of infected cells at  $t = 18$  hpi.  
729 We performed these fits each three times, under three different viral distribution models: a  
730 Poisson distribution, a negative binomial distribution, and a zero-inflated Poisson distribution. For  
731 both the Poisson and negative binomial distributions, we parameterized models with the mean of  
732 the distribution equaling the mean actual bulk MOI. When fitting to the data under the assumption  
733 of a negative binomial distribution, we further simultaneously estimated  $r$  along with  $\mu$  and the  
734 parameters of  $\alpha(s, i)$ . At  $r = \infty$ , the negative binomial distribution is equivalent to the Poisson  
735 distribution. As  $r$  becomes smaller (closer to 0), the distribution of virions become increasingly  
736 overdispersed. For the zero-inflated Poisson distribution, the mean of the zero-inflated Poisson  
737 distribution is  $(1-p) \cdot \text{bulkMOI}$ , where  $p$  is an estimated parameter between 0 and 1 that quantifies  
738 the probability of extra zero counts. When fitting the zero-inflated Poisson model, we thus  
739 estimated  $p$  along with  $m$  and the parameters of  $\alpha(s, i)$ . All viral infectivity distributions considered  
740 (Poisson, negative binomial, and zero-inflated Poisson) fed into the evaluation of  $p_i(\text{bulkMOI})$ .

741  
742 The first model of cell death rate we considered was a time-independent, input-independent  
743 model, such that cell death rates were the same across all infected cells and cell death rates did  
744 not change over the course of a cell's infection. The second model we considered was a time-  
745 dependent, input-independent model. For this model, we let the infected cell death rate be given  
746 by the Weibull hazard function, a commonly used function to incorporate time-dependency into  
747 time of death estimations. The Weibull hazard function is a two-parameter model ( $b, k$ ) with  
748 functional form given in **Table S1**. An estimate of the shape parameter  $k$  of less than 1 indicates  
749 that the death rate decreases over time, while an estimate of  $k$  greater than 1 yields a death rate

750 that increases over time. When  $k = 1$ , this time-dependent, input-independent model becomes  
751 identical to the time-independent, input-independent.

752  
753 The third and fourth models we considered allowed for cell death rates to depend on viral input:  
754 the first of these two models assumed that cell death rates were time-independent; the second  
755 further allowed for time-dependency, again according to the Weibull hazard function (**Table S1**).  
756 The input-dependency was incorporated into the third and fourth models using the monomial  $i^\varepsilon$   
757 where  $i$  is again viral input ( $i = 1, 2, 3, \dots$ ) and  $\varepsilon > 0$  is real-valued. The time-independent, input-  
758 dependent model of cell death rate has the form  $c \cdot i^\varepsilon$ , where  $c$  is a positive constant. When  $\varepsilon = 0$ ,  
759 this model becomes identical to first time-independent, input-independent cell death rate model.  
760 The fourth model, the time-dependent, input-dependent model, has the form  $\alpha(s, i) = d \cdot i^\varepsilon \cdot k \cdot s^{k-1}$ .  
761 When  $\varepsilon = 0$ , the model becomes identical to the time-dependent, input-independent model, i.e.  
762 the second model considered. When  $\varepsilon = 0$  and  $k = 1$ , the model becomes identical to the time-  
763 independent, input-independent model, i.e. the first model considered. When  $\varepsilon > 0$  and  $k = 1$ , this  
764 model is identical to the time-independent, input-dependent model, i.e. the third model.

### 765 766 **Statistical modeling of virus production**

767 To infer rates of virus production from infected cells and to determine whether these rates depend  
768 on cellular input or time since cellular infection, we developed six virus production models (**Table**  
769 **S3**) and statistically fit these models to the data shown in **Figure 4**. When fitting each of the virus  
770 production models to these data, we incorporated parameter estimates of cell death rates and  
771 viral infection distributions that were most supported by the data, in a cell line-specific manner.  
772 Specifically, for both MDCK and A549 cells, we let viral input be distributed across cells according  
773 to a negative binomial distribution and let the cell death rate be given by a Weibull hazard function  
774 (parameters provided in **Table S1, S2**).

775  
776 We considered a set of six virus production rate models,  $v(t, i)$ , which are listed in **Table S3**. The  
777 general equation governing the total amount of virus produced in bulk cell culture at  $t$  hours post  
778 infection is given by

$$779 \quad TotalVirusOutput(t, bulkMOI) = N_{cells} \cdot \exp(-\mu t) \cdot \left( \sum_{i=1}^{\infty} p_i(bulkMOI) \cdot \int_0^t v(\tau, i) \cdot \exp\left(-\int_0^{\tau} \alpha(s) ds\right) d\tau \right). \quad (3)$$

780 Here, the parameter,  $N_{cells}$ , is the initial number of cell which was based on quantification of the  
781 total number of cells used in the bulk cell culture experiments of virus output, which was 2 million  
782 cells.

### 783 784 **Statistical modeling of the interferon response**

785 To infer whether the rate of IFN induction from a cell was dependent on cellular MOI, we fit models  
786 of the interferon response (**Table S5**) to the IFN induction levels (relative to mock) that are shown  
787 in **Figure 7**. Because there was not a clear dependence of IFNB1 induction on bulk MOI and  
788 because there was no appreciable IFN induction in MDCK cells, we decided to fit models only to  
789 the IFNL1 induction data from A549 cells. While fitting these IFN response models, we assumed,  
790 based on our earlier analyses, that virions were distributed according to a negative binomial  
791 distribution and that infected cells died according to the time-dependent, input-independent model  
792 of cell death rate (parameters provided in **Table S2**). Because only two time point measurements  
793 were available, we fit the IFN response data using a piecewise approach, rather than considering

794 continuous time models of IFN induction. Specifically, we assumed that during each of the two  
795 epochs (0-8 hpi and 8-18 hpi), IFN induction occurred at a rate that was constant in time but that  
796 could depend on cellular MOI. The three different models we considered implemented different  
797 forms for MOI-dependency. Because each epoch could be governed by one of three models, a  
798 total of 9 models were fit to the data shown in **Figure 7C**.

800 The general model equation for the level of IFN induction (relative to mock) at 8 hpi is:

$$801 \quad IFN_{induction}(8hpi, bulkMOI) = (1 / p_0(bulkMOI, r)) \cdot \left( p_0(bulkMOI, r) + \sum_{i=1}^{\infty} p_i(bulkMOI, r) \cdot \lambda(i) \cdot \exp\left(-\int_0^{8hpi} \alpha(s) ds\right) \right), \quad (4)$$

802 where  $\lambda(i)$  is the induction rate model as a function cellular MOI,  $\alpha(s)$  is the time-dependent,  
803 input-independent model of cell death rate for infected A549 cells, and  $r$  is the dispersion  
804 parameter of the negative binomial distribution. The parameters associated with the time-  
805 dependent cell death rate and virus distribution models were set to the estimates given in Table  
806 S2.

808 The general model for IFN expression (relative to mock) between 8 and 18 hpi is given by:

$$809 \quad IFN_{induction}(18hpi, bulkMOI) = (1 / p_0(bulkMOI, r)) \cdot \left( p_0(bulkMOI, r) + \sum_{i=1}^{\infty} p_i(bulkMOI, r) \cdot \lambda(i) \cdot \exp\left(-\int_{8hpi}^{18hpi} \alpha(s) ds\right) \right). \quad (5)$$

810 The level of IFN expression (relative to mock) predicted by the model is given by the model-  
811 predicted level of IFN expression by 8 hpi, plus the model-predicted level of IFN expression  
812 between 8 and 18 hpi.

813  
814 We considered all nine possible model combinations (3 models for 0-8 hpi epoch x 3 models for  
815 8-18 hpi epoch), fitting each simultaneously to INFL1 data at 8 and 18 hpi (**Table S6**). The best  
816 model combination was the model that assumed linear dependence of viral input on IFN induction  
817 during the 0-8 hpi epoch and cellular MOI-independence during the 8-18 hpi epoch. (**Table S6**;  
818 **Fig 7C,D**).

### 820 **Statistical modeling of superinfection exclusion**

821 We first developed and parameterized an appropriate ‘null’ model, where both viruses are  
822 introduced simultaneously, and superinfection exclusion would not be anticipated. In this model,  
823 we assumed that cells differed in their susceptibility to viral infection. This assumption reflects our  
824 finding that viral particles are unlikely to be Poisson-distributed across cells (**Table S1**). In our null  
825 model, we did not adopt a negative binomial model to implement the possibility of viral particle  
826 overdispersion, as we had earlier, because if both reassortant viruses were assumed to be  
827 distributed according to a negative binomial distribution, viral particles (together) would not be  
828 distributed according to a negative binomial distribution. We instead considered a model that  
829 implemented different cell susceptibility classes, which we found to better accommodate viral  
830 overdispersion of distinct viral strains. To maintain simplicity, we considered only two types of  
831 cells: cells that had high susceptibility to infection and cells that had low susceptibility to infection.  
832 We defined fraction  $y$  of the cell population to be in low susceptibility state; the remaining fraction  
833  $(1-y)$  we assumed was in a high susceptibility state. We let a fraction  $x$  of the viral population enter  
834 the low susceptibility state cells; the remaining fraction of the viral population  $(1-x)$  we assumed  
835 entered the high susceptibility state cells. Under this model, the MOI of specifically the low

836 susceptibility class of cells is given by  $(\text{input MOI})^x(y)$ , and the MOI of specifically the high  
837 susceptibility class of cells is given by  $(\text{input MOI})^x(1-x)/(1-y)$ . When  $x = y$ , the Poisson distribution  
838 assumption is recovered, and both classes of cells have the same input MOI. We fit this simple  
839 model to the coinfection data, estimating three parameters: the actual rH1N2 MOI, and the  
840 fractions  $x$  and  $y$ . The parameter values, estimated using an RSS approach, are actual rH1N2  
841 MOI = 1.86 (95% CI = [1.71, 2.03]),  $x = 2.14e-4$  (95% CI = [0.334e-4, 13.8e-4]), and  $y = 0.0526$   
842 (95% CI = [0.0381, 0.0725]). This parameterized model fit the experimental data well (**Fig 7A**).  
843 Since the parameter  $x$  was estimated to be close to 0, this model effectively implemented the  
844 zero-inflated Poisson model shown in Table S1, which had slightly lower statistical support than  
845 the negative binomial distribution.

846

847 To analyze the data from the superinfection experiment, we set as given the three parameter  
848 values and simple two-state susceptibility model structure derived from the fitting of the data from  
849 the simultaneous coinfection experiment described above. We then considered two distinct  
850 models to determine how cellular MOI may impact the rate of superinfection exclusion: an input-  
851 independent model and an input-dependent model. The input-independent model assumed that  
852 all infected cells had the same lower chance of being superinfected than previously uninfected  
853 cells. The parameter  $s$  quantified the extent of susceptibility of the previously infected cells (1  
854 being full susceptibility). The input-dependent model instead assumed that cells that were infected  
855 with rH3N1 could experience different probabilities of superinfection exclusion. These different  
856 probabilities depended on a rH3N1 virus input, with, presumably, higher levels of rH3N1 virus  
857 input corresponding to higher probabilities of superinfection exclusion. For the input-dependent  
858 model, we specifically assumed a functional form given by  $r^i$ , where  $i$  denotes rH3N1 virus input  
859 and  $0 \leq r \leq 1$ . We estimated  $s$  for the input-independent model to be 0.0361 (95% CI = [0.0227,  
860 0.0576]) and  $r$  for the input-dependent model to be 0.293 (95% CI = [0.214, 0.402]). Based on  
861 AIC, the input-dependent model is strongly preferred over the input-independent model ( $\Delta\text{AIC} =$   
862 22.0) (**Table S7**).

863

#### 864 **Fitting models to data and model selection criterion**

865 To fit models to data, we minimized the sum squared error between the models and data to obtain  
866 the residual sum of squares (RSS). Note that minimizing the sum squared error is equivalent to  
867 maximizing the log-likelihood assuming normally distributed measurement error. These  
868 minimizations were done on the linear scale for the percent cells surviving and flow data, on the  
869 natural log scale for the virus output data, and on the log base 2 scale for IFN response to reflect  
870 the likely scale at which measurement error occurs for these data.

871 We calculated 95% confidence intervals by numerically estimating the covariance matrix using  
872 the “sandwich estimator.” This method approximates the observed Fisher information matrix  
873 by numerically estimating the inverse of the Hessian and allowing for the residuals to have  
874 different variances (47). We accounted for the chain rule in the log-transformation of  
875 parameters to obtain partial derivatives when estimating 95% percent confidence intervals.  
876 When parameter estimates are very large (e.g. the saturating input-dependent IFN induction  
877 models from 0-8 hpi; **Table S6**) or very close to zero (e.g. the input-dependent models of cell  
878 death under the negative binomial distribution; **Tables S1, S2**), the estimator of the covariance  
879 matrix is close to singular and thus sample variance estimates obtained from numerically  
880 inverting this matrix may be unreliable. In the more complex set of models, these large and

881 close-to-zero estimates indicate further support for a simpler model that is nested within the  
882 more complex one.

883 To perform model selection, we used the Akaike Information Criterion (AIC). AIC based on RSS  
884 values is given by the equation:  $2k + n \ln(\text{RSS}) + \text{constant}$ , where  $k$  is the number of estimated  
885 parameters and  $n$  is the number of data points (48). Since AIC is a relative measure of information  
886 loss and the model with the lowest AIC has the most support, we calculated  $\Delta\text{AIC}$  values to  
887 perform model selection by taking the difference between a given model and the model with the  
888 lowest AIC value.

889  
890 In the tables throughout, we report the fitting results of each set of models, including parameter  
891 estimates with 95% confidence intervals, minimal sum squared error (RSS), and  $\Delta\text{AIC}$  values.

892  
893 All statistical modeling code is available on GitHub: [https://github.com/Jeremy-D-](https://github.com/Jeremy-D-Harris/MOlpaper_models_data)  
894 [Harris/MOlpaper\\_models\\_data](https://github.com/Jeremy-D-Harris/MOlpaper_models_data).

895  
896 **ACKNOWLEDGMENTS**  
897 Work in the Brooke and Koelle labs on this study was generously supported by DARPA  
898 INTERCEPT contract (W911NF-17-2-0034). The Brooke lab was further supported by an NIAID  
899 grant (1R01AI139246-01A1) on this study.

900  
901 **REFERENCES**

- 902 1. Lowen AC. Constraints, Drivers, and Implications of Influenza A Virus Reassortment. *Annu*  
903 *Rev Virol.* 2017 Sep 29;4(1):105–21.
- 904 2. Brooke CB, Ince WL, Wrammert J, Ahmed R, Wilson PC, Bennink JR, et al. Most influenza  
905 a virions fail to express at least one essential viral protein. *J Virol.* 2013 Mar;87(6):3155–  
906 62.
- 907 3. Diefenbacher M, Sun J, Brooke CB. The parts are greater than the whole: the role of semi-  
908 infectious particles in influenza A virus biology. *Curr Opin Virol.* 2018 Jul 24;33:42–6.
- 909 4. Brooke CB. Population Diversity and Collective Interactions during Influenza Virus  
910 Infection. *J Virol.* 2017 Nov 15;91(22).
- 911 5. Brooke CB, Ince WL, Wei J, Bennink JR, Yewdell JW. Influenza A virus nucleoprotein  
912 selectively decreases neuraminidase gene-segment packaging while enhancing viral  
913 fitness and transmissibility. *Proc Natl Acad Sci U S A.* 2014 Nov 25;111(47):16854–9.
- 914 6. Fukuyama S, Katsura H, Zhao D, Ozawa M, Ando T, Shoemaker JE, et al. Multi-spectral  
915 fluorescent reporter influenza viruses (Color-flu) as powerful tools for *in vivo* studies. *Nat*  
916 *Commun.* 2015 Mar 25;6:6600.
- 917 7. Jacobs NT, Onuoha NO, Antia A, Steel J, Antia R, Lowen AC. Incomplete influenza A virus  
918 genomes occur frequently but are readily complemented during localized viral spread. *Nat*  
919 *Commun.* 2019 Aug 6;10(1):3526.
- 920 8. Gallagher ME, Brooke CB, Ke R, Koelle K. Causes and Consequences of Spatial Within-  
921 Host Viral Spread. *Viruses.* 2018 13;10(11).



- 922 9. Walsh JJ, Dietlein LF, Low FN, Burch GE, Mogabgab WJ. Bronchotracheal response in  
923 human influenza. Type A, Asian strain, as studied by light and electron microscopic  
924 examination of bronchoscopic biopsies. *Arch Intern Med.* 1961 Sep;108:376–88.
- 925 10. Guarner J, Shieh WJ, Dawson J, Subbarao K, Shaw M, Ferebee T, et al.  
926 Immunohistochemical and in situ hybridization studies of influenza A virus infection in  
927 human lungs. *Am J Clin Pathol.* 2000 Aug;114(2):227–33.
- 928 11. van den Brand JMA, Stittelaar KJ, van Amerongen G, Reperant L, de Waal L, Osterhaus  
929 ADME, et al. Comparison of temporal and spatial dynamics of seasonal H3N2, pandemic  
930 H1N1 and highly pathogenic avian influenza H5N1 virus infections in ferrets. *PloS One.*  
931 2012;7(8):e42343.
- 932 12. Osterlund P, Strengell M, Sarin LP, Poranen MM, Fagerlund R, Melen K, et al. Incoming  
933 Influenza A Virus Evades Early Host Recognition, while Influenza B Virus Induces  
934 Interferon Expression Directly upon Entry. *J Virol.* 2012 Oct 15;86(20):11183–93.
- 935 13. White DO, Cheyne IM. Early events in the eclipse phase of influenza and parainfluenza  
936 virus infection. *Virology.* 1966 May;29(1):49–59.
- 937 14. White DO, Day HM, Batchelder EJ, Cheyne IM, Wansbrough AJ. DELAY IN THE  
938 MULTIPLICATION OF INFLUENZA VIRUS. *Virology.* 1965 Feb;25:289–302.
- 939 15. Ramos I, Smith G, Ruf-Zamojski F, Martinez-Romero C, Fribourg M, Carbajal EA, et al.  
940 Innate immune response to influenza virus at single-cell resolution in human epithelial cells  
941 revealed paracrine induction of interferon lambda 1. *J Virol.* 2019 Aug 2;
- 942 16. Timm A, Yin J. Kinetics of virus production from single cells. *Virology.* 2012 Mar  
943 1;424(1):11–7.
- 944 17. Martin K, Helenius A. Nuclear transport of influenza virus ribonucleoproteins: the viral  
945 matrix protein (M1) promotes export and inhibits import. *Cell.* 1991 Oct 4;67(1):117–30.
- 946 18. Furuta Y, Takahashi K, Kuno-Maekawa M, Sangawa H, Uehara S, Kozaki K, et al.  
947 Mechanism of action of T-705 against influenza virus. *Antimicrob Agents Chemother.* 2005  
948 Mar;49(3):981–6.
- 949 19. Dou D, Hernández-Neuta I, Wang H, Östbye H, Qian X, Thiele S, et al. Analysis of IAV  
950 Replication and Co-infection Dynamics by a Versatile RNA Viral Genome Labeling Method.  
951 *Cell Rep.* 2017 Jul;20(1):251–63.
- 952 20. Phipps KL, Ganti K, Carnaccini S, Manandhar M, Jacobs NT, Pickett BE, et al. Collective  
953 interactions augment influenza A virus replication in a host-dependent manner. *bioRxiv*  
954 [Internet]. 2019 Aug 15 [cited 2019 Aug 21]; Available from:  
955 <http://biorxiv.org/lookup/doi/10.1101/736108>
- 956 21. Sun J, Brooke CB. Influenza A Virus Superinfection Potential Is Regulated by Viral  
957 Genomic Heterogeneity. Denison MR, editor. *mBio* [Internet]. 2018 Oct 30 [cited 2019 May  
958 2];9(5). Available from: <http://mbio.asm.org/lookup/doi/10.1128/mBio.01761-18>

- 959 22. Andreu-Moreno I, Sanjuán R. Collective Infection of Cells by Viral Aggregates Promotes  
960 Early Viral Proliferation and Reveals a Cellular-Level Allee Effect. *Curr Biol*. 2018 Oct  
961 22;28(20):3212-3219.e4.
- 962 23. Gutiérrez S, Yvon M, Thébaud G, Monsion B, Michalakis Y, Blanc S. Dynamics of the  
963 Multiplicity of Cellular Infection in a Plant Virus. *PLOS Pathog*. 2010 Sep  
964 16;6(9):e1001113.
- 965 24. Russell AB, Elshina E, Kowalsky JR, Te Velthuis AJW, Bloom JD. Single-cell virus  
966 sequencing of influenza infections that trigger innate immunity. *J Virol*. 2019 May 8;
- 967 25. Russell AB, Trapnell C, Bloom JD. Extreme heterogeneity of influenza virus infection in  
968 single cells. *eLife* [Internet]. 2018 Feb 16 [cited 2018 Mar 15];7. Available from:  
969 <https://elifesciences.org/articles/32303>
- 970 26. Heldt FS, Kupke SY, Dorl S, Reichl U, Frensing T. Single-cell analysis and stochastic  
971 modelling unveil large cell-to-cell variability in influenza A virus infection. *Nat Commun*.  
972 2015 Nov 20;6:8938.
- 973 27. Sun J, Vera JC, Drnevich J, Lin YT, Ke R, Brooke CB. Single cell heterogeneity in  
974 influenza A virus gene expression shapes the innate antiviral response to infection. Lauring  
975 AS, editor. *PLOS Pathog*. 2020 Jul 2;16(7):e1008671.
- 976 28. Guo F, Li S, Caglar MU, Mao Z, Liu W, Woodman A, et al. Single-Cell Virology: On-Chip  
977 Investigation of Viral Infection Dynamics. *Cell Rep*. 2017 Nov;21(6):1692–704.
- 978 29. Iwasaki A, Pillai PS. Innate immunity to influenza virus infection. *Nat Rev Immunol*. 2014  
979 May;14(5):315–28.
- 980 30. Everitt AR, Clare S, Pertel T, John SP, Wash RS, Smith SE, et al. IFITM3 restricts the  
981 morbidity and mortality associated with influenza. *Nature*. 2012 Mar 25;484(7395):519–23.
- 982 31. Killip MJ, Fodor E, Randall RE. Influenza virus activation of the interferon system. *Virus  
983 Res*. 2015 Nov 2;209:11–22.
- 984 32. Österlund P, Strengell M, Sarin LP, Poranen MM, Fagerlund R, Melén K, et al. Incoming  
985 Influenza A Virus Evades Early Host Recognition, while Influenza B Virus Induces  
986 Interferon Expression Directly upon Entry. *J Virol*. 2012 Oct 15;86(20):11183–93.
- 987 33. Lazear HM, Schoggins JW, Diamond MS. Shared and Distinct Functions of Type I and  
988 Type III Interferons. *Immunity*. 2019 Apr 16;50(4):907–23.
- 989 34. Killip MJ, Jackson D, Pérez-Cidoncha M, Fodor E, Randall RE. Single-cell studies of IFN- $\beta$   
990 promoter activation by wild-type and NS1-defective influenza A viruses. *J Gen Virol*. 2017  
991 Mar;98(3):357–63.
- 992 35. Galani IE, Triantafyllia V, Eleminiadou E-E, Koltsida O, Stavropoulos A, Manioudaki M, et  
993 al. Interferon- $\lambda$  Mediates Non-redundant Front-Line Antiviral Protection against Influenza  
994 Virus Infection without Compromising Host Fitness. *Immunity*. 2017 16;46(5):875-890.e6.

- 995 36. Klinkhammer J, Schnepf D, Ye L, Schwaderlapp M, Gad HH, Hartmann R, et al. IFN- $\lambda$   
996 prevents influenza virus spread from the upper airways to the lungs and limits virus  
997 transmission. *eLife* [Internet]. 2018 Apr 13 [cited 2019 Jun 25];7. Available from:  
998 <https://elifesciences.org/articles/33354>
- 999 37. Hemann EA, Green R, Turnbull JB, Langlois RA, Savan R, Gale M. Interferon- $\lambda$  modulates  
1000 dendritic cells to facilitate T cell immunity during infection with influenza A virus. *Nat*  
1001 *Immunol* [Internet]. 2019 Jun 24 [cited 2019 Jun 26]; Available from:  
1002 <http://www.nature.com/articles/s41590-019-0408-z>
- 1003 38. Forero A, Ozarkar S, Li H, Lee CH, Hemann EA, Nadsombati MS, et al. Differential  
1004 Activation of the Transcription Factor IRF1 Underlies the Distinct Immune Responses  
1005 Elicited by Type I and III Interferons. *Immunity* [Internet]. 2019 Aug [cited 2019 Aug 27];  
1006 Available from: <https://linkinghub.elsevier.com/retrieve/pii/S1074761319303231>
- 1007 39. Varble A, Albrecht RA, Backes S, Crumiller M, Bouvier NM, Sachs D, et al. Influenza A  
1008 virus transmission bottlenecks are defined by infection route and recipient host. *Cell Host*  
1009 *Microbe*. 2014 Nov 12;16(5):691–700.
- 1010 40. McCrone JT, Woods RJ, Martin ET, Malosh RE, Monto AS, Lauring AS. Stochastic  
1011 processes constrain the within and between host evolution of influenza virus. *eLife*  
1012 [Internet]. 2018 May 3 [cited 2019 Jan 7];7. Available from:  
1013 <https://elifesciences.org/articles/35962>
- 1014 41. Farrell A, Brooke C, Koelle K, Ke R. Coinfection of semi-infectious particles can contribute  
1015 substantially to influenza infection dynamics. *bioRxiv* [Internet]. 2019 Feb 12 [cited 2019  
1016 Jun 26]; Available from: <http://biorxiv.org/lookup/doi/10.1101/547349>
- 1017 42. Koelle K, Farrell AP, Brooke CB, Ke R. Within-host infectious disease models  
1018 accommodating cellular coinfection, with an application to influenza. *Virus Evol* [Internet].  
1019 2019 Jul 1 [cited 2019 Jul 31];5(2). Available from:  
1020 <https://academic.oup.com/ve/article/doi/10.1093/ve/vez018/5529690>
- 1021 43. Díaz-Muñoz SL, Sanjuán R, West S. Sociovirology: Conflict, Cooperation, and  
1022 Communication among Viruses. *Cell Host Microbe*. 2017 Oct;22(4):437–41.
- 1023 44. Reed LJ, Muench H. A simple method of estimating fifty per cent endpoints. *Am J*  
1024 *Epidemiol*. 1938 May;27(3):493–7.
- 1025 45. Matlin KS. Ammonium chloride slows transport of the influenza virus hemagglutinin but  
1026 does not cause mis-sorting in a polarized epithelial cell line. *J Biol Chem*. 1986 Nov  
1027 15;261(32):15172–8.
- 1028 46. Hoffmann E, Stech J, Guan Y, Webster RG, Perez DR. Universal primer set for the full-  
1029 length amplification of all influenza A viruses. *Arch Virol*. 2001 Dec 1;146(12):2275–89.
- 1030 47. Amemiya T. *Advanced econometrics*. Harvard university press; 1985.
- 1031 48. Burnham, Kenneth P. Anderson, David Raymond. *Model selection and multimodel*  
1032 *inference a practical information-theoretic approach*. New York: Springer; 2002.

## 1033 FIGURE LEGENDS

1034 **Figure 1. Precise quantification of actual bulk MOI. (A)** Extracellular virus concentrations  
1035 present in the inoculum (0 hpi), remaining unbound following adsorption (1 hpi), and measured  
1036 extracellularly at 3 hpi for both MDCK and A549 cells, at the indicated bulk MOIs. Extracellular  
1037 virus concentrations are given in units of viral genome equivalents (GE) per cell. 0 hpi data points  
1038 show single viral measurements from the inoculum used for all replicates. 1 hpi and 3 hpi points  
1039 show individual measurements from replicate infection wells. **(B)** Virus output at 3 or 6 hpi from  
1040 MDCK cells infected in triplicate with PR8 at the indicated intended MOIs and treated with either  
1041 PBS or with 40  $\mu$ M T-705 for 2 hrs prior to infection and throughout the duration of infection. **(C)**  
1042 Quantification by RT-qPCR of virus present in inoculum (0 hpi; “added MOI”), virus adsorbed into  
1043 cells after 1 hpi (calculated by subtracting extracellular virus present at 1 hpi from that present in  
1044 inoculum at 0 hpi; “adsorbed MOI”), and virus expected to actually contribute to infection  
1045 (calculated by subtracting the average of three replicates of extracellular virus measurements at  
1046 3 hpi from adsorbed MOI; “actual MOI”) for MDCK and A549 cells.

1047  
1048 **Figure 2. MDCK cell death rates are time-dependent and input-independent. (A)** The  
1049 numbers of MDCK cells surviving following infection, as determined by trypan blue exclusion  
1050 at the indicated timepoints across our experimental range of bulk MOIs. Values represent the  
1051 number of trypan blue negative cells in each sample at 3, 6, 12, and 18 hours post infection (hpi).  
1052 Lines indicate the best model fit to these data, which is given by the time-dependent, input-  
1053 independent cell death rate model, as parameterized in **Table S1**. **(B)** Estimated input-  
1054 independent cell death rate over the course of cellular infection (solid) and constant background  
1055 cell death rate (dashed; obtained from mock infected cells). **(C)** Percent of surviving MDCK cells  
1056 that are infected at 18 hpi, as measured by FACS (FACS plots shown in **Fig S1**). The line indicates  
1057 the negative binomial distribution with time-dependent input-independent cell death rate model fit  
1058 evaluated at 18 hpi. Statistical parameterization of this model (overdispersion parameter  $r = 0.597$ ;  
1059 **Table S1**) indicates a high level of overdispersion and significant deviation from a Poisson-  
1060 distributed model. Data from the highest bulk MOI were excluded from model fits due to the lack  
1061 of confidence in the accuracy of FACS measurements at the highest MOI examined.

1062  
1063 **Figure 3. A549 cell death rates are time-dependent and input-independent. (A)** The  
1064 numbers of A549 cells surviving following infection, as determined by trypan blue exclusion  
1065 at the indicated timepoints across our experimental range of bulk MOIs. Values represent the  
1066 number of trypan blue negative cells in each sample. Lines indicate the best model fit to these  
1067 data, given by the time-dependent, input-independent cell death rate model, as parameterized  
1068 in **Table S2**. **(B)** Estimated A549 cell death rate (solid) and the constant background cell death  
1069 model (dashed), fitting to both mock infected cells and MOI treatments over the course of  
1070 infection. **(C)** Percent of surviving A549 cells that are infected at 18 hpi (FACS data). The line  
1071 indicates the negative binomial distribution ( $r = 0.338$ ; **Table S2**) with time-dependent input-  
1072 independent cell death rate model fit evaluated at 18 hpi. Data from the highest bulk MOI were  
1073 excluded from model fits due to the lack of confidence in the accuracy of FACS measurements  
1074 at the highest MOI examined.

1075  
1076 **Figure 4. Cellular co-infection increases the rate of virus production in MDCK cells but not**  
1077 **in A549 cells. (A)** Viral output from single cycle infections of MDCK cells or A549 cells with PR8  
1078 over a range of bulk MOIs, as measured by RT-qPCR at the indicated hours post infection. Each  
1079 data point represents both the actual MOI and viral output from a single infection well. Trend lines  
1080 show linear regressions performed on the log-log scale. All regression slopes for MDCK cells are

1081 significantly positive ( $p < 0.0001$ ; 6 hpi: slope = 2.2,  $R^2 = 0.90$ ; 12 hpi: slope = 1.15,  $R^2 = 0.71$ ; 18  
1082 hpi: slope = 0.88,  $R^2 = 0.78$ ). All regression slopes for A549 cells are significantly positive ( $p <$   
1083  $0.01$ ; 6 hpi: slope = 0.71,  $R^2 = 0.68$ ; 12 hpi: slope = 0.61,  $R^2 = 0.44$ ; 18 hpi: slope = 0.48,  $R^2 =$   
1084  $0.49$ ). **(B)** The time-dependent, linear input-dependent model of virus production fit to virus output  
1085 data from MDCK cells at the indicated timepoints. **(C)** Visualization of the time-dependent, linear  
1086 input-dependent model of virus production from infected MDCK cells, parameterized with values  
1087 shown in Table S3. Rates of virus production are shown over time for cells with virus input of  $i =$   
1088 1, 4, and 8. **(D)**. Same as panel (B) but for A549 cells. **(E)** Visualization of the time-dependent,  
1089 input-independent model of virus production rate from infected A549 cells.

1090  
1091 **Figure 5. Cellular co-infection increases the efficiency of virus production in MDCK cells**  
1092 **but not in A549 cells.** Per capita virus output calculated as the ratio of output viral genomes over  
1093 input viral genomes for individual infection replicates at the indicated timepoints vs. bulk MOI for  
1094 MDCK or A549 cells. Trend lines represent linear regressions performed on the log-log scale for  
1095 each time point plotted on the semilog scale. P values for the correlations between bulk MOI and  
1096 per capita virus output at the indicated timepoints are shown.

1097  
1098 **Figure 6. Cellular co-infection enhances ISG induction in A549 but not MDCK. (A)** MDCK  
1099 and **(B)** A549 cells were infected with PR8 under single cycle conditions at the indicated bulk  
1100 MOIs. Levels of cellular ISG15 and Mx1 transcript were measured by RT-qPCR at 8 and 18 hpi,  
1101 compared to levels in mock cells. P values for the correlations between bulk MOI and fold  
1102 induction of the indicated ISGs at the indicated timepoints are shown.

1103  
1104 **Figure 7. Cellular co-infection enhances type III (but not type I) IFN induction in A549 cells,**  
1105 **but has no significant effects on MDCK cell IFN induction. (A)** Levels of cellular IFNB1 and  
1106 IFNL1 transcript were measured by RT-qPCR at the times indicated in MDCK cells infected with  
1107 PR8 under single cycle conditions at a range of bulk MOIs. Each data point represents values  
1108 from a single infection well and lines represent log-log linear regressions. No significant positive  
1109 correlation between IFNB1 induction and bulk MOI at 8 hpi and 18 hpi ( $p = 0.21$  and  $p = 0.24$ ,  
1110 respectively), and no significant positive correlation between IFNL1 induction and bulk MOI at 8  
1111 hpi and 18 hpi ( $p = 0.98$  and  $p = 0.15$ , respectively). **(B)** Same as in (A) but for A549 cells. No  
1112 significant correlation between IFNB1 induction and bulk MOI at 8 hpi ( $p = 0.81$ ), but at 18 hpi the  
1113 slope is significantly non-zero ( $p = 0.0002$ ). For IFNL1, there is a significant positive correlation  
1114 between normalized IFNL1 induction and bulk MOI at both timepoints ( $p < 0.0001$ ). **(C)** Three IFN  
1115 induction model fits to IFNL1 induction data in A549 cells at 8 and 18 hpi. Note that for the 0-8 hr  
1116 plot, linear+linear and linear+input-independent are overlapping since they are the same for this  
1117 epoch, and for the 8-18 hr plot, input-independent+input-independent and linear+input-  
1118 independent are nearly overlapping. **(D)** IFN induction rates for the linear + input-independent  
1119 model. From 0-8 hpi, IFN induction rates increase linearly with viral input:  $i = 1, 10, 20$ , and from  
1120 8-18 hpi, the IFN induction rate is independent of viral input.

1121  
1122 **Figure 8. Cellular co-infection decreases the potential for superinfection. (A)** MDCK cells  
1123 were simultaneously coinfecting with rH1N2 (at a constant MOI) and rH3N1 (at varying input MOIs  
1124 shown; x-axis) under single cycle conditions; SIE would not be expected to occur during  
1125 simultaneous coinfection. Plot shows the percentages of all cells infected with rH1N2 (H1+;  
1126 includes co-infected cells; dark blue), all cells infected with rH3N1 (H3+; includes co-infected cells;  
1127 red), and cells coinfecting with both (H3+H1+; light blue), as determined by flow cytometry at 19  
1128 hpi. Solid lines indicate the two-susceptibility state null model fit to these data. **(B)** MDCK cells



1129 were infected with rH3N1 at varying input MOIs (x-axis) under single cycle conditions. 6 hours  
1130 later, cells were superinfected with rH1N2 at an intended MOI of 0.5 TCID<sub>50</sub>/cell. Percentages of  
1131 cells that were H1+ (including cells co-infected with rH3N1), H3+ (including cells co-infected with  
1132 rH1N2), and H3+H1+ were determined by flow cytometry at 19 hpi. Lines indicate statistical fits  
1133 of the input-independent (solid) and input-dependent (dashed) models. **(C)** Visualization of the  
1134 input-dependent model of superinfection susceptibility where the susceptibility of infected cells to  
1135 superinfection is shown relative to the susceptibility of uninfected cells.

1136

## 1137 SUPPLEMENTAL FIGURE LEGENDS

1138

1139 **Fig S1. FACS quantification of infected cell percentages based on HA and NP expression.**  
1140 for MDCK (top row) and A549 (bottom row) cells. Gates for determining infection status were  
1141 drawn based on NP and HA expression of mock cells. Gates were modified by eye for the MDCK  
1142 cell line at the MOI of 5.35 for MDCK and 7.81 for A549 to better exclude negative cells. These  
1143 data were generated from the same experiments used to generate cell death and virus production  
1144 data.

1145 **Figure S2. MDCK cell survival patterns cannot be reproduced under a time-independent,  
1146 input-independent cell death rate model. (A)** The number of cells remaining for 3, 6, 12, and  
1147 18 hpi, respectively, as a function of bulk MOI, along with time-independent, input-independent  
1148 cell death rate model fits (lines). **(B)** Number of surviving MDCK cells that are infected at 18 hpi,  
1149 as measured by FACS, along with the negative binomial distribution model fit (line). As in Figure  
1150 2C, statistical parameterization of this model (overdispersion parameter  $r = 0.756$ ; **Table S1**)  
1151 indicates a high level of overdispersion and significant deviation from a Poisson-distributed model.  
1152 FACS data at high bulk MOI (open circles) were excluded from model fits due to the lack of  
1153 confidence in high MOI measurements.

1154 **Figure S3. MDCK cell survival patterns cannot be reproduced under a time-independent,  
1155 input-dependent cell death rate model. (A)** The number of cells remaining for 3, 6, 12, and 18  
1156 hpi, respectively, as a function of bulk MOI, along with time-independent, input-dependent cell  
1157 death rate model fits (lines). **(B)** Number of surviving MDCK cells that are infected at 18 hpi, as  
1158 measured by FACS, along with the negative binomial distribution model fit (line). As in Figure 2C,  
1159 statistical parameterization of this model (overdispersion parameter  $r = 0.756$ ; **Table S1**) indicates  
1160 a high level of overdispersion and significant deviation from a Poisson-distributed model. FACS  
1161 data at high bulk MOI (open circles) were excluded from model fits due to the lack of confidence  
1162 in high MOI measurements.

1163 **Figure S4. Comparison of Poisson, zero-inflated Poisson, and negative binomial  
1164 distribution fits to MDCK and A549 FACS data. (A)** Number of surviving MDCK cells infected  
1165 at 18 hpi (dots) and viral dispersion model fits to these data (lines). Under the most supported cell  
1166 death rate model (the time-dependent, input-independent model), the best fit to the FACS data  
1167 occurred under the negative binomial model with an overdispersion parameter of  $r = 0.597$  (solid  
1168 orange line; **Table S1**). FACS data points from the high MOI experiments (open circles) were  
1169 excluded from the model fit. Higher levels of overdispersion ( $r = 0.2$ ; blue line) underestimated  
1170 percentages of infected cells at 18 hpi. Lower levels of overdispersion ( $r = 2$ ; blue line)  
1171 overestimated percentages of infected cells at 18 hpi. To obtain the negative binomial models at  
1172 fixed dispersion parameter values,  $r = 0.2, 2$ , we re-fit the parameters of the time-dependent,  
1173 input-independent cell death rate model. A Poisson distribution assumption ( $r = \infty$ ; solid red line)  
1174 severely overestimated percentages of infected cells at 18 hpi. The zero-inflated Poisson is shown

1175 with the time-dependent, input-independent cell death rate model and with the probability of extra  
1176 zeros,  $p = 0.312$  (dashed red line). **Table S1** shows the four cell death rate models parameterized  
1177 under the assumption of Poisson, negative binomial, and zero-inflated Poisson distributions for  
1178 viral input across cells.  $\Delta$ AIC values for these models are significantly larger than 0, indicating  
1179 that the negative binomial distribution model is strongly preferred over both the Poisson and zero-  
1180 inflated Poisson distribution models. **(B)** Number of surviving A549 cells infected at 18 hpi (dots)  
1181 and viral dispersion model fits to these data (lines). Under the most supported cell death rate  
1182 model (the time-dependent, input-independent model), the best fit to the FACS data occurred  
1183 under the negative binomial model with an overdispersion parameter of  $r = 0.338$  (solid orange  
1184 line; **Table S2**). FACS data points from the high MOI experiments (open circles) were excluded  
1185 from the model fit. Higher levels of overdispersion ( $r = 0.1$ ; dashed blue line) underestimated  
1186 percentages of infected cells at 18 hpi. Lower levels of overdispersion ( $r = 1$ ; dashed blue line)  
1187 overestimated percentages of infected cells at 18 hpi. A Poisson distribution assumption ( $r = \infty$ ;  
1188 solid red line) severely overestimated percentages of infected cells at 18 hpi. The zero-inflated  
1189 Poisson is shown with the time-dependent, input-independent cell death rate model and with the  
1190 probability of extra zeros,  $p = 0.493$  (dashed red line). **Table S2** shows the four cell death rate  
1191 models parameterized under the assumption of Poisson, negative binomial, and zero-inflated  
1192 Poisson distributions for viral input across A549 cells.  $\Delta$ AIC values for these models are  
1193 significantly larger than 0, indicating that the negative binomial distribution model is also strongly  
1194 preferred in A549 cells over the Poisson distribution models.  
1195

1196 **Figure S5. Most supported time-independent models of virus production cannot capture**  
1197 **virus production kinetics. (A)** Time-independent, linear input-dependent model fits to virus  
1198 production in MDCK cells overestimate viral output at 6 hpi and underestimate the output at 18  
1199 hpi. **(B)** The virus production rate is constant over time and the rate increases linearly with  
1200 increasing cellular MOI:  $i = 1, 4, 8$ . **(C)** Time-independent, input-independent model fits to virus  
1201 production in A549 cells overestimate viral output at 6 hpi and underestimate viral output at 18  
1202 hpi. **(D)** The virus production rate is constant over time and independent of the cellular MOI.

1203 **Figure S6. The input-independent model overestimates virus output at low bulk MOI and**  
1204 **underestimates virus output at high bulk MOI in MDCK cells. (A)** The time delay in virus  
1205 production was estimated in this model to be 5.27 days. After that point, the virus production rate  
1206 was assumed to increase linearly in time, with an estimated slope of 2.52. **(B)** Model fits to virus  
1207 production in MDCK cells (**Table S3**).

1208 **Figure S7. The linear input-dependent model cannot capture virus production in A549 cells.**  
1209 **(A)** The virus production rate is zero until  $\sim 5$  hpi after which point the rate increases linearly in  
1210 time. The slope of this linear increase depends on the cellular MOI:  $i=1, 4, 8$  (**Table S4**). **(B)** The  
1211 linear input-dependent model fits to data: at 6 and 12 hpi, the model overestimates viral output  
1212 for high bulk MOI values, and at 18 hpi, the model underestimates viral output for low bulk MOI  
1213 values.

1214  
1215 **Figure S8. Cellular co-infection enhances ISG induction in A549 but not MDCK.** MDCK and  
1216 A549 cells were infected with PR8 under single cycle conditions at the range of bulk MOIs: 0.08-  
1217 7.86 and 0.06-26.1, respectively. Levels of cellular IFNB1 and IFNL1 transcript were measured  
1218 by RT-qPCR at 8 and 18 hpi, compared to levels in mock cells. Interferon stimulated genes (ISGs)  
1219 induction relative to mock vs. bulk MOI in MDCK cells at 8 and 18 hpi; ISG15, ZC3HAV1, and

1220 Mx1 did not show significant positive correlation between ISG induction and bulk MOI at 8 hpi ( $p$   
1221 = 0.69,  $p = 0.11$ ,  $p = 0.46$ , respectively) nor 18 hpi ( $p = 0.06$ ,  $p = 0.17$ ,  $p = 0.08$ , respectively).  
1222 ISGs induction relative to mock vs. bulk MOI in A549 cells at 8 and 18 hpi showed different  
1223 temporal patterns of induction. Significant positive correlation between ISG15 induction and bulk  
1224 MOI was not found at 8 hpi ( $p = 0.07$ ) yet at 18 hpi ( $p = 0.0002$ ). Significant positive correlation  
1225 between ZC3HAV1 induction and bulk MOI was found at 8 hpi ( $p = 0.01$ ) yet not at 18 hpi ( $p =$   
1226 0.31). For Mx1, there is a significant positive correlation to bulk MOI at both timepoints ( $p = 0.02$   
1227 for both).

1228

## 1229 SUPPLEMENTAL TABLE LEGENDS

1230

1231 **Table S1. Fits of cell death rate models to MDCK cell data.** Rows correspond to distinct cell  
1232 death rate models. The mathematical formulation for each cell death rate model is provided in the  
1233 second column. The models are group by the virus distribution assumption, going from top to  
1234 bottom: Poisson, Negative binomial, zero-inflated Poisson. Point estimates and 95% confidence  
1235 intervals are provided in the third column for each model's parameters. Confidence intervals for  
1236 parameter estimates close to zero were omitted (Methods). Units of the parameters are provided  
1237 in the fourth column. The fifth column lists the residual sum of squares (RSS) for each model,  
1238 parameterized with the point estimates of the third column. The model most supported by the data  
1239 is the time-dependent, input-independent model ( $\Delta AIC = 0$ ). Models with higher  $\Delta AIC$  have less  
1240 statistical support.

1241

1242 **Table S2. Fits of cell death rate models to A549 cell data.** As in Table S1, rows correspond to  
1243 distinct cell death rate models assuming the viral infection distribution from top to bottom: Poisson,  
1244 negative binomial, zero-inflated Poisson. The model most supported by the data is the time-  
1245 dependent, input-independent model ( $\Delta AIC = 0$ ).

1246

1247 **Table S3. Fits of viral production rate models to MDCK cell data.**

1248 Rows correspond to distinct viral production rate models. Parameter estimates are given along  
1249 with 95 percent confidence intervals for viral production rate model parameters. The model  
1250 that is most supported by the data has  $\Delta AIC = 0$ , and models with higher  $\Delta AIC$  have less  
1251 statistical support. Confidence intervals for high parameter estimates were omitted (see  
1252 methods).

1253

1254 **Table S4. Fits of viral production rate models to A549 cell data.**

1255 Rows correspond to distinct viral production rate models. Parameter estimates are given along  
1256 with 95 percent confidence intervals for viral production rate model parameters. The model  
1257 that is most supported by the data has  $\Delta AIC = 0$ , and models with higher  $\Delta AIC$  have less  
1258 statistical support.

1259

1260 **Table S5. Descriptions of interferon induction models.** We considered three IFN induction  
1261 models in which the induction rates are independent of time but differ based on the viral input.  
1262 We fit an input-independent, linear input-dependent, and saturating input-dependent induction  
1263 rate models to data at 8 and 18 hpi, giving a total of nine model combinations (see Table S6).

1264

1265 **Table S6. Fits of IFN induction models to IFNL1 data in A549 cells.** Rows correspond to  
1266 different combinations of the IFN induction rate models listed in Table 5 from 0-8 hpi and from  
1267 8-18 hpi. The first column gives the model number from 0-8 hpi, and the third column gives  
1268 the model number from 8-18 hpi. Parameter estimates are given along with 95 percent

1269 confidence intervals for IFN induction rate model parameters. The model that is most  
1270 supported by the data has  $\Delta AIC = 0$ , and models with higher  $\Delta AIC$  have less statistical support.  
1271 Confidence intervals for high parameter estimates were omitted (see methods).

1272

1273 **Table S7. Fits of superinfection exclusion models to FACs data in MDCK cells.**

1274 Rows correspond to distinct viral production rate models. The first model assumed that all  
1275 rH3N1-infected cells had the same reduced probability of becoming infected with rH1N2  
1276 (input-independent). The second model assumed that the probability of being infected with  
1277 rH1N2 decreased with cellular rH3N1 MOI (input-dependent). Parameter estimates are given  
1278 along with 95 percent confidence intervals for viral production rate model parameters. The  
1279 model that is most supported by the data has  $\Delta AIC = 0$ , and models with higher  $\Delta AIC$  have  
1280 less statistical support.

1281

1282 **Table S8. RT-qPCR primers for the quantification of interferons, interferon stimulated**

1283 **genes, and endogenous control for MDCK (canine) and A549 (human) cell lines.** SYBR  
1284 green primers were used for the quantification of canine targets of IFNB1, IFNL1, ISG15, and  
1285 Mx1, with  $\beta$ -actin as the endogenous control. For A549, Taqman assays were used for the  
1286 quantification of IFNB1 and IFNL1 with GAPDH as the endogenous control and SYBR green  
1287 chemistry was used for the quantification of ISG15 and Mx1, with  $\beta$ -actin as the endogenous  
1288 control.

1289

1290 **SUPPLEMENTAL SOURCE DATA FILE LEGEND**

1291

1292 This file contains the source data used to generate every figure (main and supplemental) in this  
1293 manuscript. Each tab of the Excel file includes figure panels, which are often grouped according  
1294 to cell line, MDCK or A549 cells. For data that was used in multiple figures, we included these  
1295 only once and made a note within the sheet of any other figures that also show these data.  
1296 Oftentimes, the data are included in both a main figure (found in the text) and one or more  
1297 supplemental figures; in these cases, we labeled the tabs according to the main figure.
